# Supplementary material for: Designing an iron-doped basic magnesium sulfate photocatalyst for wide spectral photoresponse and superior catalytic activity
Source: Royal Society of Chemistry journal article supplement (doi:10.1039/d4ta08607d), 2025-01-01
Supplement: d4ta08607d1.xlsx [file d4ta08607d1.xlsx]

## Sheet: origin
1
10.0116243007132955 0.0000000000000000 -0.0208957482848038
0.0000000000000000 12.6904064522931144 0.0000000000000000
-3.5018991014414134 0.0000000000000000 14.1057884908583482
Mg H S O
24 96 4 84
Direct
0.2626859167675916 0.4423777860712526 0.4324026970450578
0.2683999518674113 0.2046361666339923 0.4370291188670120
0.7540406117844183 0.1928497447761334 0.9251504853211779
0.7662385044540428 0.4584493318354867 0.9327399183078811
0.7455980437769072 0.0770552294775293 0.7439963277232874
0.7608047856874616 0.4391460058612693 0.5707655340392047
0.7435341071832045 0.2112366934719790 0.5600543193761907
0.7742309147596990 0.3265960848991191 0.7529541793076979
0.2507475129509981 0.1893617393680788 0.0629237757266239
0.2419063229413354 0.4532148875883655 0.0586830817526723
0.2946876079093644 0.0806415068344240 0.2595338048946310
0.2621747431855546 0.9426680868024834 0.4334129780362139
0.2679521856739102 0.7050603054294760 0.4358223603223172
0.2362013895035327 0.8258530021230059 0.2396161841079000
0.7533829115225243 0.6927232291435198 0.9249524315892790
0.7662056691404279 0.9581055944532076 0.9331194868185481
0.7444920594247568 0.5772524375195913 0.7431682846613564
0.7615536143972560 0.9404123052237009 0.5713986990481132
0.7419073639194910 0.7126944705312631 0.5588981996933348
0.7737190051263112 0.8264607163397800 0.7529541686585821
0.2506640219673478 0.6898367754212492 0.0631840089930448
0.2420735268984917 0.9533110213841212 0.0586218428535989
0.2922739372254726 0.5803720710021827 0.2578630070940165
0.2347837983035736 0.3260501138725333 0.2390117446655103
0.9610064429360909 0.1739530775917546 0.8282452769014270
0.9642658101564570 0.4761123569088398 0.8297493913350232
0.9720342384587702 0.3179761046600161 0.6618927982507817
0.9412104691082844 0.0831934076577619 0.6562946949376428
0.4071409355449854 0.5740850567107311 0.5871721973379619
0.0355144621749601 0.1888099763777590 0.5007859451547185
0.1551766933654936 0.2256298307826806 0.5858371366738598
0.1654384454404919 0.4269201058324231 0.5935219954869260
0.1500295412188439 0.0494395547237478 0.5539258516351796
0.0367031882284506 0.0781780865946193 0.9906488420173841
0.9886581353272040 0.3808049266475437 0.0796659189631219
0.4595119854556578 0.4202455474537188 0.3378273916898218
0.4664926183361353 0.2491804738070696 0.3318084662951682
0.4650017199025031 0.0656637720175560 0.1522133934189712
0.4364391009694211 0.3286271553481562 0.1603852753376623
0.8560965202633586 0.3102876986291924 0.0752147950441094
0.5305293975846269 0.4459243258725609 0.9987349294963265
0.6506540422686148 0.9836237082279681 0.0850626277459390
0.6590857230305250 0.1861616029339148 0.0898498771966860
0.6377812118122816 0.3081896406844771 0.0451013168222180
0.5441482599933758 0.3356584535838301 0.4931966673374769
0.4907139933914187 0.0665465889708667 0.5120589782109544
0.0596115201838540 0.1698214779400160 0.1699511276579678
0.0519798575513721 0.4789469410926123 0.1732146829088138
0.0494565574867854 0.3133185993913176 0.3385614355052378
0.0800693084666456 0.0761145792893099 0.3287107717949225
0.6578122339956235 0.5718012784639925 0.4067090526757361
0.8460358530437818 0.2068844203603290 0.3965961552608788
0.8847464206675220 0.3045496606950409 0.4645934964596399
0.9869559493023612 0.4522907170653287 0.4910876446559584
0.8484964773404852 0.9664870314811428 0.4093668234498146
0.8773624063061147 0.0764890207646960 0.0757440340894934
0.1537977978977750 0.3169316298944419 0.9027492183520441
0.5559655474205301 0.4276127106830021 0.6666406009227316
0.5494460735073128 0.2218204326497366 0.6659398109400396
0.5424205757596362 0.0764150117375871 0.8299196756227623
0.5743442256861380 0.3359489189909602 0.8307820447839300
0.0328076867648512 0.3122194649455558 0.9558778930232726
0.3344769814146152 0.4283225248376049 0.8971606307387859
0.3659304432868191 0.0459922319834972 0.9426359024175329
0.4806874552938498 0.1974728819631293 0.9867694406706143
0.3461041532217793 0.2275143262788856 0.9082264894385358
0.3887440242118472 0.3330863403872781 0.5781586627225812
0.5358998465645625 0.1427475830672858 0.4128814708755458
0.1288413878317093 0.0796421056619269 0.8748957916192774
0.1884096397516262 0.1078612730056309 0.7829908689734532
0.6653820686505717 0.2818161424318008 0.2617352080788770
0.6386851487863388 0.4011459653249362 0.2746090064049575
0.9596846613047002 0.6738169572832287 0.8265801070084058
0.9650456503484114 0.9743601857693471 0.8310249037291859
0.9716706185222221 0.8174459930191905 0.6618549085988447
0.9383570777728348 0.5837519428916588 0.6521163834158322
0.4043177928825473 0.0737383461544790 0.5889495189230647
0.0348285291651531 0.6903302016472087 0.4995371862115406
0.1554177685985955 0.7248600774880867 0.5852493910185286
0.1671890159705610 0.9261285787661507 0.5966347858016284
0.1480194759825877 0.5494981268139140 0.5499964665584632
0.0358975277736663 0.5782484621637881 0.9920050461128701
0.9889807042614606 0.8805470956892539 0.0797164096246494
0.4600994747788777 0.9203879740554903 0.3406022987629868
0.4653833073016497 0.7491993438725997 0.3254543736930874
0.4640446762687375 0.5662237598418265 0.1526128256526117
0.4376674251552208 0.8286698022552976 0.1598361489285693
0.8564828527230011 0.8096767757206806 0.0751582449933884
0.5307349102634936 0.9460802973972332 -0.0011466440957822
0.6495808687495060 0.4836614687699939 0.0849960480348234
0.6573966146927007 0.6861812760536092 0.0902992179160448
0.6374487550877928 0.8081315904842437 0.0454315835965673
0.5440450286630040 0.8374722854509152 0.4928578323612839
0.4903406006634618 0.5687531957731186 0.5083133244843973
0.0575804003528056 0.6718964667559358 0.1666528108601082
0.0532872592258139 0.9787705474220840 0.1734052853378032
0.0489626424711006 0.8143957129199322 0.3378306867146738
0.0794284835993060 0.5768380757934591 0.3281085014561476
0.6591670696171136 0.0677995163221297 0.4084856138296683
0.8465772820421985 0.7094642584234414 0.3951487190016563
0.8850543541987109 0.8069434848128090 0.4641710137621498
0.9893742805845062 0.9540072290700610 0.4943018016606917
0.8450726284204243 0.4644784534110346 0.4075415428438993
0.8756166917010086 0.5758385336506717 0.0759979872820846
0.1542274485355084 0.8157685117902060 0.9027519998999579
0.5562746313286151 0.9279517388573849 0.6665435352400610
0.5486703901662782 0.7226698604367717 0.6659274853951613
0.5417878714812625 0.5763696689566956 0.8294904813919045
0.5740564652234945 0.8355748247112958 0.8309753547198752
0.0329670276675733 0.8116783293556342 0.9556901298787051
0.3346227918810061 0.9274922569277723 0.8968316478130288
0.3666713748675586 0.5464947374338233 0.9440456159916618
0.4806242487809227 0.6970347130370370 0.9881260906156307
0.3462062425864836 0.7262183488603711 0.9091261421443279
0.3891011427034990 0.8316069574209896 0.5780296738748032
0.5343173641594915 0.6472715337567067 0.4100281093212020
0.1258655100735681 0.5812222822004002 0.8786413769251017
0.1842216774948425 0.6072034348742530 0.7852974167294554
0.6695839004766378 0.7813181362450893 0.2600008104585433
0.6408045856153461 0.8998714830932503 0.2751207200894771
0.2977211820966318 0.2948502450327853 0.7364970985362875
0.7809662863311932 0.0856997259276284 0.2458478736074236
0.2992714174965710 0.7915777565268157 0.7371941214336454
0.7790422957873585 0.5854225051632925 0.2445163399803950
0.1479332702602940 0.4718025057686238 0.5351713154248711
0.1370655783831720 0.1756531744960422 0.5308590403883605
0.3688377651069169 0.3253962195842672 0.5095837460529352
0.3951774192513174 0.0713086166361463 0.5205614085375083
0.1776618016461956 0.0753425717678045 0.3605344796831730
0.1487147761890046 0.3210895655559802 0.3540641778147529
0.3993860738943282 0.1972282852462129 0.3421387526167081
0.3630569877517623 0.4409715420831501 0.3229115575239843
0.1663388284873925 0.3218966238101302 0.6648950370941498
0.4111347857747146 0.3607354097539329 0.7193522483692963
0.2766629496276815 0.3205911127646481 0.8336880557365978
0.3272027665317501 0.1810267547522524 0.7320124267193240
0.6488667047257419 0.2309160013823763 0.0319771163066407
0.6313248708371361 0.4346587382314913 0.0299583934429743
0.8668339777336409 0.0831419247910719 0.0077801594843676
0.9014458361727813 0.3492283654226642 0.0335967391976617
0.6714668108750430 0.3278128284106842 0.8626284742415206
0.6414862547042371 0.0742130463658771 0.8539804737726873
0.8693919621731044 0.4569583107144831 0.8273399088509560
0.8686046546994393 0.1985577874054881 0.8284889041099687
0.6622301343050222 0.0855998106110270 0.1599474111330304
0.9057929819351314 0.0426796632488259 0.2230029601216708
0.8057955833991075 0.1962034098176989 0.2805630327136702
0.7392208205752481 0.0189199993823369 0.3196428208428274
0.8871836169653591 0.4311676630965418 0.4699378560855320
0.8812694038161946 0.2247744000003600 0.4650574296936173
0.6401415652863720 0.3370481181744366 0.4868862377079185
0.6174328559970624 0.1037394326822624 0.4552339866579154
0.8427671328595534 0.0787202947458686 0.6280405817569613
0.8718195149627189 0.3217703976436331 0.6448329521487957
0.6446037065744865 0.2039499146521233 0.6691977819411474
0.6500161088047335 0.4492625886327283 0.6703174068825846
0.3810994385354372 0.1793187710316290 0.9634632516927257
0.3691109534559758 0.4688920974808683 0.9571004548725572
0.1342878128263157 0.0751525196058993 0.9860767463871688
0.1333268366975832 0.3185346399777253 0.9661584257514311
0.3376327465074693 0.3231422925561319 0.1296391459801453
0.3650358453275411 0.0682859266320283 0.1412652554458939
0.1134075868071617 0.4310886062790935 0.1509425228784959
0.1559428201361861 0.1867403297677017 0.1767785079533124
0.1078253640495179 0.0803316058866344 0.8023051135170448
0.5913471207751482 0.3351433536889178 0.2505621360190980
0.1494753819801536 0.9718618546138503 0.5388214801896287
0.1361089863080287 0.6758712792265583 0.5294574498954816
0.3689929034702704 0.8251438468368790 0.5093455224257002
0.3954181818597469 0.5717295393296751 0.5185138678669367
0.1773202888540517 0.5752835068832564 0.3588238619094451
0.1482603919360835 0.8220572961127285 0.3542383577815020
0.3967625962898320 0.6996333323050282 0.3377757953540823
0.3636369805263143 0.9412047556408761 0.3239983772074845
0.1684750594765134 0.8186947896069410 0.6650157813204250
0.4131354614963558 0.8572548704255493 0.7203119457345716
0.2777124233971464 0.8181501124936835 0.8341039282250134
0.3284358669249707 0.6777026798588877 0.7330287872795013
0.6482628271852151 0.7308074752631500 0.0324574817409306
0.6314406311047511 0.9345835619092320 0.0299911862784884
0.8658958814840407 0.5835159986977506 0.0081699286360436
0.9015673005041186 0.8490575045675204 0.0336548600502994
0.6711861707558541 0.8277641812685936 0.8630145496146376
0.6409019040890748 0.5740907323388305 0.8536508121610334
0.8695531449007148 0.9567208057249877 0.8277792930569708
0.8674362955615024 0.6984451348962456 0.8278694855658014
0.6570057391840466 0.5860916391787308 0.1606266928388196
0.9002712217482285 0.5391949496202113 0.2191936024666192
0.8093005647499558 0.6959452619074948 0.2781268862345024
0.7383017998837588 0.5208807471853569 0.3200864696237603
0.8893709394931892 0.9335770690152567 0.4720789020471503
0.8808858543780024 0.7271853127628951 0.4636090406738705
0.6400370830542574 0.8393043365632863 0.4866315109291705
0.6152854059069475 0.6083944938313445 0.4527786171805812
0.8396485643044784 0.5786974036168029 0.6252424239508896
0.8714939970334350 0.8216220073933824 0.6447623500523068
0.6434681002482605 0.7044466907818762 0.6683339798652143
0.6503751500272322 0.9496708886050486 0.6707051848431643
0.3810720397389726 0.6785607790296027 0.9648729593444121
0.3690504131201068 0.9686629768430149 0.9564303034031804
0.1335045608363589 0.5751193464730096 0.9874196928209252
0.1334817670978835 0.8181743894236979 0.9660511339707764
0.3386841433693363 0.8235320574666233 0.1296972344248408
0.3639211273199136 0.5682344458445810 0.1407879295120847
0.1138324908543577 0.9304389006322672 0.1507969953728741
0.1545659035492035 0.6877868435462625 0.1756848272768950
0.1025521643022192 0.5839659040398072 0.8056025543700385
0.5946592886395705 0.8338021296824050 0.2498488185894290
0.00000000E+00 0.00000000E+00 0.00000000E+00
0.00000000E+00 0.00000000E+00 0.00000000E+00
0.00000000E+00 0.00000000E+00 0.00000000E+00
0.00000000E+00 0.00000000E+00 0.00000000E+00
0.00000000E+00 0.00000000E+00 0.00000000E+00
0.00000000E+00 0.00000000E+00 0.00000000E+00
0.00000000E+00 0.00000000E+00 0.00000000E+00
0.00000000E+00 0.00000000E+00 0.00000000E+00
0.00000000E+00 0.00000000E+00 0.00000000E+00
0.00000000E+00 0.00000000E+00 0.00000000E+00
0.00000000E+00 0.00000000E+00 0.00000000E+00
0.00000000E+00 0.00000000E+00 0.00000000E+00
0.00000000E+00 0.00000000E+00 0.00000000E+00
0.00000000E+00 0.00000000E+00 0.00000000E+00
0.00000000E+00 0.00000000E+00 0.00000000E+00
0.00000000E+00 0.00000000E+00 0.00000000E+00
0.00000000E+00 0.00000000E+00 0.00000000E+00
0.00000000E+00 0.00000000E+00 0.00000000E+00
0.00000000E+00 0.00000000E+00 0.00000000E+00
0.00000000E+00 0.00000000E+00 0.00000000E+00
0.00000000E+00 0.00000000E+00 0.00000000E+00
0.00000000E+00 0.00000000E+00 0.00000000E+00
0.00000000E+00 0.00000000E+00 0.00000000E+00
0.00000000E+00 0.00000000E+00 0.00000000E+00
0.00000000E+00 0.00000000E+00 0.00000000E+00
0.00000000E+00 0.00000000E+00 0.00000000E+00
0.00000000E+00 0.00000000E+00 0.00000000E+00
0.00000000E+00 0.00000000E+00 0.00000000E+00
0.00000000E+00 0.00000000E+00 0.00000000E+00
0.00000000E+00 0.00000000E+00 0.00000000E+00
0.00000000E+00 0.00000000E+00 0.00000000E+00
0.00000000E+00 0.00000000E+00 0.00000000E+00
0.00000000E+00 0.00000000E+00 0.00000000E+00
0.00000000E+00 0.00000000E+00 0.00000000E+00
0.00000000E+00 0.00000000E+00 0.00000000E+00
0.00000000E+00 0.00000000E+00 0.00000000E+00
0.00000000E+00 0.00000000E+00 0.00000000E+00
0.00000000E+00 0.00000000E+00 0.00000000E+00
0.00000000E+00 0.00000000E+00 0.00000000E+00
0.00000000E+00 0.00000000E+00 0.00000000E+00
0.00000000E+00 0.00000000E+00 0.00000000E+00
0.00000000E+00 0.00000000E+00 0.00000000E+00
0.00000000E+00 0.00000000E+00 0.00000000E+00
0.00000000E+00 0.00000000E+00 0.00000000E+00
0.00000000E+00 0.00000000E+00 0.00000000E+00
0.00000000E+00 0.00000000E+00 0.00000000E+00
0.00000000E+00 0.00000000E+00 0.00000000E+00
0.00000000E+00 0.00000000E+00 0.00000000E+00
0.00000000E+00 0.00000000E+00 0.00000000E+00
0.00000000E+00 0.00000000E+00 0.00000000E+00
0.00000000E+00 0.00000000E+00 0.00000000E+00
0.00000000E+00 0.00000000E+00 0.00000000E+00
0.00000000E+00 0.00000000E+00 0.00000000E+00
0.00000000E+00 0.00000000E+00 0.00000000E+00
0.00000000E+00 0.00000000E+00 0.00000000E+00
0.00000000E+00 0.00000000E+00 0.00000000E+00
0.00000000E+00 0.00000000E+00 0.00000000E+00
0.00000000E+00 0.00000000E+00 0.00000000E+00
0.00000000E+00 0.00000000E+00 0.00000000E+00
0.00000000E+00 0.00000000E+00 0.00000000E+00
0.00000000E+00 0.00000000E+00 0.00000000E+00
0.00000000E+00 0.00000000E+00 0.00000000E+00
0.00000000E+00 0.00000000E+00 0.00000000E+00
0.00000000E+00 0.00000000E+00 0.00000000E+00
0.00000000E+00 0.00000000E+00 0.00000000E+00
0.00000000E+00 0.00000000E+00 0.00000000E+00
0.00000000E+00 0.00000000E+00 0.00000000E+00
0.00000000E+00 0.00000000E+00 0.00000000E+00
0.00000000E+00 0.00000000E+00 0.00000000E+00
0.00000000E+00 0.00000000E+00 0.00000000E+00
0.00000000E+00 0.00000000E+00 0.00000000E+00
0.00000000E+00 0.00000000E+00 0.00000000E+00
0.00000000E+00 0.00000000E+00 0.00000000E+00
0.00000000E+00 0.00000000E+00 0.00000000E+00
0.00000000E+00 0.00000000E+00 0.00000000E+00
0.00000000E+00 0.00000000E+00 0.00000000E+00
0.00000000E+00 0.00000000E+00 0.00000000E+00
0.00000000E+00 0.00000000E+00 0.00000000E+00
0.00000000E+00 0.00000000E+00 0.00000000E+00
0.00000000E+00 0.00000000E+00 0.00000000E+00
0.00000000E+00 0.00000000E+00 0.00000000E+00
0.00000000E+00 0.00000000E+00 0.00000000E+00
0.00000000E+00 0.00000000E+00 0.00000000E+00
0.00000000E+00 0.00000000E+00 0.00000000E+00
0.00000000E+00 0.00000000E+00 0.00000000E+00
0.00000000E+00 0.00000000E+00 0.00000000E+00
0.00000000E+00 0.00000000E+00 0.00000000E+00
0.00000000E+00 0.00000000E+00 0.00000000E+00
0.00000000E+00 0.00000000E+00 0.00000000E+00
0.00000000E+00 0.00000000E+00 0.00000000E+00
0.00000000E+00 0.00000000E+00 0.00000000E+00
0.00000000E+00 0.00000000E+00 0.00000000E+00
0.00000000E+00 0.00000000E+00 0.00000000E+00
0.00000000E+00 0.00000000E+00 0.00000000E+00
0.00000000E+00 0.00000000E+00 0.00000000E+00
0.00000000E+00 0.00000000E+00 0.00000000E+00
0.00000000E+00 0.00000000E+00 0.00000000E+00
0.00000000E+00 0.00000000E+00 0.00000000E+00
0.00000000E+00 0.00000000E+00 0.00000000E+00
0.00000000E+00 0.00000000E+00 0.00000000E+00
0.00000000E+00 0.00000000E+00 0.00000000E+00
0.00000000E+00 0.00000000E+00 0.00000000E+00
0.00000000E+00 0.00000000E+00 0.00000000E+00
0.00000000E+00 0.00000000E+00 0.00000000E+00
0.00000000E+00 0.00000000E+00 0.00000000E+00
0.00000000E+00 0.00000000E+00 0.00000000E+00
0.00000000E+00 0.00000000E+00 0.00000000E+00
0.00000000E+00 0.00000000E+00 0.00000000E+00
0.00000000E+00 0.00000000E+00 0.00000000E+00
0.00000000E+00 0.00000000E+00 0.00000000E+00
0.00000000E+00 0.00000000E+00 0.00000000E+00
0.00000000E+00 0.00000000E+00 0.00000000E+00
0.00000000E+00 0.00000000E+00 0.00000000E+00
0.00000000E+00 0.00000000E+00 0.00000000E+00
0.00000000E+00 0.00000000E+00 0.00000000E+00
0.00000000E+00 0.00000000E+00 0.00000000E+00
0.00000000E+00 0.00000000E+00 0.00000000E+00
0.00000000E+00 0.00000000E+00 0.00000000E+00
0.00000000E+00 0.00000000E+00 0.00000000E+00
0.00000000E+00 0.00000000E+00 0.00000000E+00
0.00000000E+00 0.00000000E+00 0.00000000E+00
0.00000000E+00 0.00000000E+00 0.00000000E+00
0.00000000E+00 0.00000000E+00 0.00000000E+00
0.00000000E+00 0.00000000E+00 0.00000000E+00
0.00000000E+00 0.00000000E+00 0.00000000E+00
0.00000000E+00 0.00000000E+00 0.00000000E+00
0.00000000E+00 0.00000000E+00 0.00000000E+00
0.00000000E+00 0.00000000E+00 0.00000000E+00
0.00000000E+00 0.00000000E+00 0.00000000E+00
0.00000000E+00 0.00000000E+00 0.00000000E+00
0.00000000E+00 0.00000000E+00 0.00000000E+00
0.00000000E+00 0.00000000E+00 0.00000000E+00
0.00000000E+00 0.00000000E+00 0.00000000E+00
0.00000000E+00 0.00000000E+00 0.00000000E+00
0.00000000E+00 0.00000000E+00 0.00000000E+00
0.00000000E+00 0.00000000E+00 0.00000000E+00
0.00000000E+00 0.00000000E+00 0.00000000E+00
0.00000000E+00 0.00000000E+00 0.00000000E+00
0.00000000E+00 0.00000000E+00 0.00000000E+00
0.00000000E+00 0.00000000E+00 0.00000000E+00
0.00000000E+00 0.00000000E+00 0.00000000E+00
0.00000000E+00 0.00000000E+00 0.00000000E+00
0.00000000E+00 0.00000000E+00 0.00000000E+00
0.00000000E+00 0.00000000E+00 0.00000000E+00
0.00000000E+00 0.00000000E+00 0.00000000E+00
0.00000000E+00 0.00000000E+00 0.00000000E+00
0.00000000E+00 0.00000000E+00 0.00000000E+00
0.00000000E+00 0.00000000E+00 0.00000000E+00
0.00000000E+00 0.00000000E+00 0.00000000E+00
0.00000000E+00 0.00000000E+00 0.00000000E+00
0.00000000E+00 0.00000000E+00 0.00000000E+00
0.00000000E+00 0.00000000E+00 0.00000000E+00
0.00000000E+00 0.00000000E+00 0.00000000E+00
0.00000000E+00 0.00000000E+00 0.00000000E+00
0.00000000E+00 0.00000000E+00 0.00000000E+00
0.00000000E+00 0.00000000E+00 0.00000000E+00
0.00000000E+00 0.00000000E+00 0.00000000E+00
0.00000000E+00 0.00000000E+00 0.00000000E+00
0.00000000E+00 0.00000000E+00 0.00000000E+00
0.00000000E+00 0.00000000E+00 0.00000000E+00
0.00000000E+00 0.00000000E+00 0.00000000E+00
0.00000000E+00 0.00000000E+00 0.00000000E+00
0.00000000E+00 0.00000000E+00 0.00000000E+00
0.00000000E+00 0.00000000E+00 0.00000000E+00
0.00000000E+00 0.00000000E+00 0.00000000E+00
0.00000000E+00 0.00000000E+00 0.00000000E+00
0.00000000E+00 0.00000000E+00 0.00000000E+00
0.00000000E+00 0.00000000E+00 0.00000000E+00
0.00000000E+00 0.00000000E+00 0.00000000E+00
0.00000000E+00 0.00000000E+00 0.00000000E+00
0.00000000E+00 0.00000000E+00 0.00000000E+00
0.00000000E+00 0.00000000E+00 0.00000000E+00
0.00000000E+00 0.00000000E+00 0.00000000E+00
0.00000000E+00 0.00000000E+00 0.00000000E+00
0.00000000E+00 0.00000000E+00 0.00000000E+00
0.00000000E+00 0.00000000E+00 0.00000000E+00
0.00000000E+00 0.00000000E+00 0.00000000E+00
0.00000000E+00 0.00000000E+00 0.00000000E+00
0.00000000E+00 0.00000000E+00 0.00000000E+00
0.00000000E+00 0.00000000E+00 0.00000000E+00
0.00000000E+00 0.00000000E+00 0.00000000E+00
0.00000000E+00 0.00000000E+00 0.00000000E+00
0.00000000E+00 0.00000000E+00 0.00000000E+00
0.00000000E+00 0.00000000E+00 0.00000000E+00
0.00000000E+00 0.00000000E+00 0.00000000E+00
0.00000000E+00 0.00000000E+00 0.00000000E+00
0.00000000E+00 0.00000000E+00 0.00000000E+00
0.00000000E+00 0.00000000E+00 0.00000000E+00
0.00000000E+00 0.00000000E+00 0.00000000E+00
0.00000000E+00 0.00000000E+00 0.00000000E+00
0.00000000E+00 0.00000000E+00 0.00000000E+00
0.00000000E+00 0.00000000E+00 0.00000000E+00
0.00000000E+00 0.00000000E+00 0.00000000E+00
0.00000000E+00 0.00000000E+00 0.00000000E+00
0.00000000E+00 0.00000000E+00 0.00000000E+00
0.00000000E+00 0.00000000E+00 0.00000000E+00
0.00000000E+00 0.00000000E+00 0.00000000E+00
0.00000000E+00 0.00000000E+00 0.00000000E+00
0.00000000E+00 0.00000000E+00 0.00000000E+00
0.00000000E+00 0.00000000E+00 0.00000000E+00
0.00000000E+00 0.00000000E+00 0.00000000E+00
0.00000000E+00 0.00000000E+00 0.00000000E+00
0.00000000E+00 0.00000000E+00 0.00000000E+00
0.00000000E+00 0.00000000E+00 0.00000000E+00
0.00000000E+00 0.00000000E+00 0.00000000E+00
0.00000000E+00 0.00000000E+00 0.00000000E+00
0.00000000E+00 0.00000000E+00 0.00000000E+00
0.00000000E+00 0.00000000E+00 0.00000000E+00

## Sheet: 1Fe-BMS
1
9.7007722227195927 0.0000000000000000 -2.4387317249017069
0.0000000000000020 12.7112117193327077 0.0000000000000008
0.0000000000000000 0.0000000000000000 14.5400365429801255
Mg Fe H S O
23 1 96 4 84
Direct
0.2625225011174739 0.4423452408157764 0.4323213644948131
0.2683500257859919 0.2046021817277807 0.4372207066846879
0.7544901163212422 0.1928641934938098 0.9254017284710231
0.7651737052749201 0.4585315942547555 0.9326625728317602
0.7456305398430330 0.0771819577765667 0.7441205787627155
0.7618092489139865 0.4387247622962429 0.5697763936507820
0.7442478912559036 0.2111772470601894 0.5598655695769679
0.7755473320999742 0.3251659668994107 0.7531631163254624
0.2509406843303615 0.1894601182816033 0.0630888186696397
0.2422939273346243 0.4531329290470748 0.0590511476361384
0.2949466964550052 0.0806304206630371 0.2597182804439973
0.2620132594054378 0.9427075663250387 0.4333572101580256
0.2677262565810213 0.7052376230138402 0.4360800608668306
0.2363296237254751 0.8259079654264611 0.2396791564674331
0.7527810692409680 0.6926237481568864 0.9242359950608231
0.7666346005049463 0.9580456272723130 0.9332484034740227
0.7608608289148658 0.9409255739160928 0.5710297830582216
0.7430931599584882 0.7138894057433860 0.5572026415490640
0.7750690175793810 0.8281732283759903 0.7530566425624958
0.2507471986894020 0.6896901811361619 0.0634785552415839
0.2419615423474164 0.9531644351909985 0.0588772006616267
0.2932144892911228 0.5808328267109001 0.2584815557819969
0.2354895397434728 0.3258085127175467 0.2391869015809770
0.7375546917426358 0.5778407951700179 0.7413051446205127
0.9614697366065250 0.1730957971149328 0.8288432824279087
0.9607075674095543 0.4792325942575829 0.8268687483611264
0.9732218282988032 0.3181838470996707 0.6614634367141119
0.9416796546417334 0.0826154322369450 0.6562069784069369
0.4069475900354466 0.5737053892627991 0.5872761898248856
0.0352389925515704 0.1886963325351702 0.5007418642996343
0.1554834327262853 0.2252899379784601 0.5857776428690948
0.1655626810603273 0.4270545955500646 0.5933284403463944
0.1495090599158383 0.0489153286659356 0.5537529282152750
0.0363476958476051 0.0781405815109456 0.9909287599267309
0.9889055217019641 0.3804688279884156 0.0797909644637162
0.4597970001695357 0.4203451141095791 0.3384946923019586
0.4669257463033057 0.2490426275572498 0.3321649940013611
0.4652442459352834 0.0656215774208550 0.1524947745888887
0.4376382123213974 0.3284576886234626 0.1606473300094680
0.8558253499596243 0.3104359050841199 0.0752710899739976
0.5304225645054275 0.4458138793575662 0.9988868737697122
0.6508657274229689 0.9835085828548671 0.0850874762016456
0.6590439325131118 0.1860750674819822 0.0896820058984203
0.6376912939021137 0.3080352317588145 0.0450715321232485
0.5443772797759183 0.3354580314605399 0.4933897030131477
0.4910388522778254 0.0663624199641165 0.5116195989076996
0.0597002314232118 0.1702021731284510 0.1697933303917822
0.0524002167229081 0.4782291895616703 0.1733646800259635
0.0493374431317548 0.3132303446205196 0.3382197153821841
0.0800050007641236 0.0763040019955947 0.3285538339622279
0.6580203475332648 0.5719039944127519 0.4067488569715823
0.8464789964530122 0.2064608214636098 0.3961924755159770
0.8853404396029702 0.3043323476050820 0.4638526235759282
0.9873596490870716 0.4517364191988512 0.4908219160117906
0.8473056648372708 0.9667126961659741 0.4087372603696680
0.8781054994817273 0.0763527162480781 0.0758030660719362
0.1539725810155242 0.3169446363367783 0.9029931157501168
0.5559534377954065 0.4271747364134191 0.6698533770198791
0.5502869524753967 0.2218840620266224 0.6654124510916432
0.5423711856324444 0.0764582927762345 0.8301005400692698
0.5742864155853504 0.3350497790500228 0.8307109419081377
0.0328661675813032 0.3129758393062306 0.9560077890899299
0.3343970755443376 0.4284945593383606 0.8971197869130593
0.3658750739760915 0.0458109914170971 0.9427899947927465
0.4804934100155581 0.1972743617124776 0.9865851492852916
0.3457318623726924 0.2271918746630175 0.9079965069187290
0.3893274253417651 0.3331992111729729 0.5782532704380191
0.5357321522004344 0.1429012192592948 0.4129933987845161
0.1296730614087007 0.0797056185950055 0.8764348634550803
0.1886613974159617 0.1079995502015837 0.7840270506815241
0.6669788276740580 0.2814714986043957 0.2617877876276749
0.6396416086474771 0.4005763544849866 0.2749394814718485
0.9575269954959086 0.6724614726999233 0.8244922945318185
0.9652909927910709 0.9749957387187268 0.8313738885453390
0.9721621363094904 0.8184277978761682 0.6613385723962717
0.9358315148625738 0.5837222605417199 0.6543262679318594
0.4054525855897779 0.0733703227475228 0.5889225788414182
0.0346761437700745 0.6903896852406198 0.4994003175581234
0.1552805815902737 0.7245653175655883 0.5853660316755328
0.1667318898589091 0.9257969228642859 0.5963170258146954
0.1475502532271391 0.5496282364189041 0.5498911452245676
0.0355285392551759 0.5780269976149696 0.9921111088828372
0.9891055198679118 0.8803693169126605 0.0800656733231263
0.4606569881990299 0.9205329564050851 0.3414683007123606
0.4657650906017053 0.7500724438308559 0.3270399983947374
0.4646586627580009 0.5661039424789640 0.1530533895865478
0.4378871686108029 0.8287625007355335 0.1601587016314142
0.8558924702695214 0.8099456153226076 0.0749045063536044
0.5306975769579221 0.9460898143563571 0.9988652450219466
0.6496635519716366 0.4830591768449144 0.0853040212224871
0.6575826654470799 0.6861754917483258 0.0899060289994808
0.6375986068856232 0.8080467736929438 0.0452300272294890
0.5431125839415991 0.8376005998923209 0.4929737309181603
0.4907359294218316 0.5689965718831299 0.5084575555565541
0.0579212723567609 0.6717368924780469 0.1673683813335030
0.0530615965350495 0.9785029465657908 0.1736224515983794
0.0488031428308921 0.8142099859812536 0.3377296361152780
0.0796116871476292 0.5768171861859098 0.3278153541768361
0.6592644260175841 0.0683306580549532 0.4083047848606258
0.8470904493853192 0.7097619049591253 0.3939946155253234
0.8852089818852237 0.8077907209052340 0.4625505598618327
0.9883529908128412 0.9535728185781502 0.4936918244869974
0.8453842520668909 0.4640235398212935 0.4070053013324060
0.8755585432389351 0.5760508540410291 0.0749860406891846
0.1546131967472918 0.8152406976559188 0.9031497166665191
0.5562169560711001 0.9279278824530021 0.6666118915579263
0.5493423153409939 0.7231149545324134 0.6681328796181804
0.5371344144934627 0.5764846520755861 0.8295265830141531
0.5740600650407724 0.8362787877955944 0.8307204455899150
0.0330860026747175 0.8100550609829124 0.9555307012582628
0.3344538278136970 0.9274613400300393 0.8969907718240339
0.3667146787123104 0.5465211970693666 0.9442085847531231
0.4806188044314555 0.6964396381282022 0.9879425690650352
0.3457897168810073 0.7257384417518964 0.9093297370179942
0.3889640833668068 0.8318715173244817 0.5782329003821650
0.5338011934632599 0.6470237581499384 0.4097860499402060
0.1247683028457100 0.5812686819573302 0.8796389980530768
0.1819505639142571 0.6071046621603875 0.7854932799587749
0.6698323263117208 0.7814105921479306 0.2600637703737469
0.6405266026902984 0.8999159560338722 0.2751684811627595
0.2982294327533414 0.2949773134130107 0.7364004901530380
0.7809384900995546 0.0858813819700761 0.2458615309437777
0.2993992687480866 0.7913746124333206 0.7373451220635212
0.7791002289306895 0.5853205965650798 0.2443682392816836
0.1477275456397156 0.4720243968621631 0.5350187533105877
0.1369107281280850 0.1752385477134727 0.5309601099531112
0.3687270389361783 0.3254116827191781 0.5096736152614753
0.3954797941708294 0.0711434583354059 0.5204323396417332
0.1776959935571031 0.0754330241823408 0.3605566689317048
0.1487860742602032 0.3209987311866630 0.3540769199597368
0.3994470269341852 0.1972832091885639 0.3422490144192700
0.3631683410469407 0.4409857591304604 0.3229696232760014
0.1675268996050345 0.3226832619438922 0.6641951156458824
0.4126811114341379 0.3601946401057403 0.7198049944982537
0.2767249747605119 0.3207855523470532 0.8333547177513941
0.3269551024977904 0.1812755489109292 0.7318669269107428
0.6487773173945162 0.2308239565039495 0.0318478234596968
0.6312763699481283 0.4341239699133885 0.0302603539157744
0.8672853588478273 0.0831438259992468 0.0078269502609237
0.9012571659360115 0.3491082920787605 0.0335597537930012
0.6716507516474693 0.3276950758205947 0.8625676333474903
0.6416202445731715 0.0743204928607936 0.8540773868209249
0.8690322653464565 0.4547738942545212 0.8284543403163459
0.8689285633485502 0.1980239024382098 0.8286400316085250
0.6622328237303481 0.0857111104366623 0.1599485868375113
0.9056844138160083 0.0425794114002081 0.2231720237168886
0.8063759808675482 0.1962029463097905 0.2803946714931930
0.7387339759663927 0.0199337359080355 0.3198769598823281
0.8876011800391720 0.4300931811949207 0.4691436474801347
0.8816109716509234 0.2245802605987119 0.4646415275686374
0.6402945906770608 0.3368193716972485 0.4866495168009466
0.6174889162493946 0.1038575998605579 0.4552891966168340
0.8430325283323148 0.0786251193952069 0.6280133852208253
0.8728418442898064 0.3220294838682277 0.6448424655012006
0.6455973139759760 0.2038960187548830 0.6690464671778878
0.6499276838078935 0.4460459021849821 0.6693056358524279
0.3807374103471542 0.1790381468260841 0.9631787919262064
0.3691240874551037 0.4689821386595356 0.9570852094690743
0.1342471270632046 0.0749775736031303 0.9866038151841807
0.1337125588635732 0.3179888218502262 0.9664359963117228
0.3386583876572208 0.3232861826421569 0.1298265141472348
0.3651231676895162 0.0682567006933390 0.1413524846322068
0.1131077000724378 0.4299027640171175 0.1509580433983763
0.1563257202742490 0.1867259095647655 0.1769168623210714
0.1083881352410529 0.0804471325546116 0.8037611092237638
0.5927643020666428 0.3346625355098239 0.2504458441757100
0.1487700994223048 0.9714975885193993 0.5385110613723419
0.1360223214743001 0.6757795797122375 0.5294448026591055
0.3686980347037780 0.8253427063031196 0.5095532135719214
0.3956822297223108 0.5720531004302195 0.5186489369058007
0.1775194623892771 0.5753867802468936 0.3589191643030304
0.1482112599930207 0.8220397137324654 0.3542168350796071
0.3974029487555075 0.6998972082992012 0.3387562173082440
0.3639460557113089 0.9410384465025643 0.3242543389131047
0.1685148002965273 0.8185267315433130 0.6651194799728428
0.4133684439142283 0.8568302475579915 0.7203657743491685
0.2779898299933469 0.8178599552580214 0.8341985119135099
0.3283988541606395 0.6776535901866989 0.7330544728936695
0.6486311064201424 0.7308639788901579 0.0321602663166962
0.6315625554480562 0.9345312371230746 0.0300066239633631
0.8662490917984340 0.5832767726976970 0.0071679245919166
0.9015542507696582 0.8492176065601913 0.0336833212909900
0.6713905571528181 0.8283166584446150 0.8625989058809903
0.6357928874015766 0.5742859473806851 0.8564986484985091
0.8696206926147105 0.9571195403590008 0.8276478465073769
0.8688907206625582 0.7018658585509685 0.8294839317695497
0.6569090575204339 0.5859543834263197 0.1605562935804259
0.9004810187958810 0.5393405114435836 0.2191229649105772
0.8091596879650389 0.6956562439575719 0.2778924003775299
0.7386256201284959 0.5210166696282238 0.3200901836033008
0.8881603072989308 0.9333917870197534 0.4713358587608157
0.8811184746999895 0.7280692767818010 0.4624057652699304
0.6388516724939877 0.8400962262262492 0.4859837085111584
0.6152315327508981 0.6084135795800378 0.4526960584963896
0.8393690274340979 0.5794421538383221 0.6201243814162981
0.8718094706904959 0.8225802464455648 0.6441496179318590
0.6446599604818627 0.7093094406769442 0.6676499422125547
0.6497991590344934 0.9509052542339108 0.6702670507066791
0.3807830197456806 0.6781486359046296 0.9650836625741070
0.3690727676454711 0.9685868896123598 0.9565682531961340
0.1334996458577287 0.5749242105708336 0.9878183915571714
0.1337306963208183 0.8176442827338282 0.9663866116931804
0.3387873232062237 0.8235227629454951 0.1297936545885483
0.3644253555664594 0.5682544532442610 0.1415042963246484
0.1135109297355334 0.9300282480276671 0.1511260931221506
0.1549567281771492 0.6876766228479047 0.1760657885921409
0.1006798294975087 0.5840438640648027 0.8063996585882526
0.5947827266526172 0.8338823687675662 0.2497537227060055
0.00000000E+00 0.00000000E+00 0.00000000E+00
0.00000000E+00 0.00000000E+00 0.00000000E+00
0.00000000E+00 0.00000000E+00 0.00000000E+00
0.00000000E+00 0.00000000E+00 0.00000000E+00
0.00000000E+00 0.00000000E+00 0.00000000E+00
0.00000000E+00 0.00000000E+00 0.00000000E+00
0.00000000E+00 0.00000000E+00 0.00000000E+00
0.00000000E+00 0.00000000E+00 0.00000000E+00
0.00000000E+00 0.00000000E+00 0.00000000E+00
0.00000000E+00 0.00000000E+00 0.00000000E+00
0.00000000E+00 0.00000000E+00 0.00000000E+00
0.00000000E+00 0.00000000E+00 0.00000000E+00
0.00000000E+00 0.00000000E+00 0.00000000E+00
0.00000000E+00 0.00000000E+00 0.00000000E+00
0.00000000E+00 0.00000000E+00 0.00000000E+00
0.00000000E+00 0.00000000E+00 0.00000000E+00
0.00000000E+00 0.00000000E+00 0.00000000E+00
0.00000000E+00 0.00000000E+00 0.00000000E+00
0.00000000E+00 0.00000000E+00 0.00000000E+00
0.00000000E+00 0.00000000E+00 0.00000000E+00
0.00000000E+00 0.00000000E+00 0.00000000E+00
0.00000000E+00 0.00000000E+00 0.00000000E+00
0.00000000E+00 0.00000000E+00 0.00000000E+00
0.00000000E+00 0.00000000E+00 0.00000000E+00
0.00000000E+00 0.00000000E+00 0.00000000E+00
0.00000000E+00 0.00000000E+00 0.00000000E+00
0.00000000E+00 0.00000000E+00 0.00000000E+00
0.00000000E+00 0.00000000E+00 0.00000000E+00
0.00000000E+00 0.00000000E+00 0.00000000E+00
0.00000000E+00 0.00000000E+00 0.00000000E+00
0.00000000E+00 0.00000000E+00 0.00000000E+00
0.00000000E+00 0.00000000E+00 0.00000000E+00
0.00000000E+00 0.00000000E+00 0.00000000E+00
0.00000000E+00 0.00000000E+00 0.00000000E+00
0.00000000E+00 0.00000000E+00 0.00000000E+00
0.00000000E+00 0.00000000E+00 0.00000000E+00
0.00000000E+00 0.00000000E+00 0.00000000E+00
0.00000000E+00 0.00000000E+00 0.00000000E+00
0.00000000E+00 0.00000000E+00 0.00000000E+00
0.00000000E+00 0.00000000E+00 0.00000000E+00
0.00000000E+00 0.00000000E+00 0.00000000E+00
0.00000000E+00 0.00000000E+00 0.00000000E+00
0.00000000E+00 0.00000000E+00 0.00000000E+00
0.00000000E+00 0.00000000E+00 0.00000000E+00
0.00000000E+00 0.00000000E+00 0.00000000E+00
0.00000000E+00 0.00000000E+00 0.00000000E+00
0.00000000E+00 0.00000000E+00 0.00000000E+00
0.00000000E+00 0.00000000E+00 0.00000000E+00
0.00000000E+00 0.00000000E+00 0.00000000E+00
0.00000000E+00 0.00000000E+00 0.00000000E+00
0.00000000E+00 0.00000000E+00 0.00000000E+00
0.00000000E+00 0.00000000E+00 0.00000000E+00
0.00000000E+00 0.00000000E+00 0.00000000E+00
0.00000000E+00 0.00000000E+00 0.00000000E+00
0.00000000E+00 0.00000000E+00 0.00000000E+00
0.00000000E+00 0.00000000E+00 0.00000000E+00
0.00000000E+00 0.00000000E+00 0.00000000E+00
0.00000000E+00 0.00000000E+00 0.00000000E+00
0.00000000E+00 0.00000000E+00 0.00000000E+00
0.00000000E+00 0.00000000E+00 0.00000000E+00
0.00000000E+00 0.00000000E+00 0.00000000E+00
0.00000000E+00 0.00000000E+00 0.00000000E+00
0.00000000E+00 0.00000000E+00 0.00000000E+00
0.00000000E+00 0.00000000E+00 0.00000000E+00
0.00000000E+00 0.00000000E+00 0.00000000E+00
0.00000000E+00 0.00000000E+00 0.00000000E+00
0.00000000E+00 0.00000000E+00 0.00000000E+00
0.00000000E+00 0.00000000E+00 0.00000000E+00
0.00000000E+00 0.00000000E+00 0.00000000E+00
0.00000000E+00 0.00000000E+00 0.00000000E+00
0.00000000E+00 0.00000000E+00 0.00000000E+00
0.00000000E+00 0.00000000E+00 0.00000000E+00
0.00000000E+00 0.00000000E+00 0.00000000E+00
0.00000000E+00 0.00000000E+00 0.00000000E+00
0.00000000E+00 0.00000000E+00 0.00000000E+00
0.00000000E+00 0.00000000E+00 0.00000000E+00
0.00000000E+00 0.00000000E+00 0.00000000E+00
0.00000000E+00 0.00000000E+00 0.00000000E+00
0.00000000E+00 0.00000000E+00 0.00000000E+00
0.00000000E+00 0.00000000E+00 0.00000000E+00
0.00000000E+00 0.00000000E+00 0.00000000E+00
0.00000000E+00 0.00000000E+00 0.00000000E+00
0.00000000E+00 0.00000000E+00 0.00000000E+00
0.00000000E+00 0.00000000E+00 0.00000000E+00
0.00000000E+00 0.00000000E+00 0.00000000E+00
0.00000000E+00 0.00000000E+00 0.00000000E+00
0.00000000E+00 0.00000000E+00 0.00000000E+00
0.00000000E+00 0.00000000E+00 0.00000000E+00
0.00000000E+00 0.00000000E+00 0.00000000E+00
0.00000000E+00 0.00000000E+00 0.00000000E+00
0.00000000E+00 0.00000000E+00 0.00000000E+00
0.00000000E+00 0.00000000E+00 0.00000000E+00
0.00000000E+00 0.00000000E+00 0.00000000E+00
0.00000000E+00 0.00000000E+00 0.00000000E+00
0.00000000E+00 0.00000000E+00 0.00000000E+00
0.00000000E+00 0.00000000E+00 0.00000000E+00
0.00000000E+00 0.00000000E+00 0.00000000E+00
0.00000000E+00 0.00000000E+00 0.00000000E+00
0.00000000E+00 0.00000000E+00 0.00000000E+00
0.00000000E+00 0.00000000E+00 0.00000000E+00
0.00000000E+00 0.00000000E+00 0.00000000E+00
0.00000000E+00 0.00000000E+00 0.00000000E+00
0.00000000E+00 0.00000000E+00 0.00000000E+00
0.00000000E+00 0.00000000E+00 0.00000000E+00
0.00000000E+00 0.00000000E+00 0.00000000E+00
0.00000000E+00 0.00000000E+00 0.00000000E+00
0.00000000E+00 0.00000000E+00 0.00000000E+00
0.00000000E+00 0.00000000E+00 0.00000000E+00
0.00000000E+00 0.00000000E+00 0.00000000E+00
0.00000000E+00 0.00000000E+00 0.00000000E+00
0.00000000E+00 0.00000000E+00 0.00000000E+00
0.00000000E+00 0.00000000E+00 0.00000000E+00
0.00000000E+00 0.00000000E+00 0.00000000E+00
0.00000000E+00 0.00000000E+00 0.00000000E+00
0.00000000E+00 0.00000000E+00 0.00000000E+00
0.00000000E+00 0.00000000E+00 0.00000000E+00
0.00000000E+00 0.00000000E+00 0.00000000E+00
0.00000000E+00 0.00000000E+00 0.00000000E+00
0.00000000E+00 0.00000000E+00 0.00000000E+00
0.00000000E+00 0.00000000E+00 0.00000000E+00
0.00000000E+00 0.00000000E+00 0.00000000E+00
0.00000000E+00 0.00000000E+00 0.00000000E+00
0.00000000E+00 0.00000000E+00 0.00000000E+00
0.00000000E+00 0.00000000E+00 0.00000000E+00
0.00000000E+00 0.00000000E+00 0.00000000E+00
0.00000000E+00 0.00000000E+00 0.00000000E+00
0.00000000E+00 0.00000000E+00 0.00000000E+00
0.00000000E+00 0.00000000E+00 0.00000000E+00
0.00000000E+00 0.00000000E+00 0.00000000E+00
0.00000000E+00 0.00000000E+00 0.00000000E+00
0.00000000E+00 0.00000000E+00 0.00000000E+00
0.00000000E+00 0.00000000E+00 0.00000000E+00
0.00000000E+00 0.00000000E+00 0.00000000E+00
0.00000000E+00 0.00000000E+00 0.00000000E+00
0.00000000E+00 0.00000000E+00 0.00000000E+00
0.00000000E+00 0.00000000E+00 0.00000000E+00
0.00000000E+00 0.00000000E+00 0.00000000E+00
0.00000000E+00 0.00000000E+00 0.00000000E+00
0.00000000E+00 0.00000000E+00 0.00000000E+00
0.00000000E+00 0.00000000E+00 0.00000000E+00
0.00000000E+00 0.00000000E+00 0.00000000E+00
0.00000000E+00 0.00000000E+00 0.00000000E+00
0.00000000E+00 0.00000000E+00 0.00000000E+00
0.00000000E+00 0.00000000E+00 0.00000000E+00
0.00000000E+00 0.00000000E+00 0.00000000E+00
0.00000000E+00 0.00000000E+00 0.00000000E+00
0.00000000E+00 0.00000000E+00 0.00000000E+00
0.00000000E+00 0.00000000E+00 0.00000000E+00
0.00000000E+00 0.00000000E+00 0.00000000E+00
0.00000000E+00 0.00000000E+00 0.00000000E+00
0.00000000E+00 0.00000000E+00 0.00000000E+00
0.00000000E+00 0.00000000E+00 0.00000000E+00
0.00000000E+00 0.00000000E+00 0.00000000E+00
0.00000000E+00 0.00000000E+00 0.00000000E+00
0.00000000E+00 0.00000000E+00 0.00000000E+00
0.00000000E+00 0.00000000E+00 0.00000000E+00
0.00000000E+00 0.00000000E+00 0.00000000E+00
0.00000000E+00 0.00000000E+00 0.00000000E+00
0.00000000E+00 0.00000000E+00 0.00000000E+00
0.00000000E+00 0.00000000E+00 0.00000000E+00
0.00000000E+00 0.00000000E+00 0.00000000E+00
0.00000000E+00 0.00000000E+00 0.00000000E+00
0.00000000E+00 0.00000000E+00 0.00000000E+00
0.00000000E+00 0.00000000E+00 0.00000000E+00
0.00000000E+00 0.00000000E+00 0.00000000E+00
0.00000000E+00 0.00000000E+00 0.00000000E+00
0.00000000E+00 0.00000000E+00 0.00000000E+00
0.00000000E+00 0.00000000E+00 0.00000000E+00
0.00000000E+00 0.00000000E+00 0.00000000E+00
0.00000000E+00 0.00000000E+00 0.00000000E+00
0.00000000E+00 0.00000000E+00 0.00000000E+00
0.00000000E+00 0.00000000E+00 0.00000000E+00
0.00000000E+00 0.00000000E+00 0.00000000E+00
0.00000000E+00 0.00000000E+00 0.00000000E+00
0.00000000E+00 0.00000000E+00 0.00000000E+00
0.00000000E+00 0.00000000E+00 0.00000000E+00
0.00000000E+00 0.00000000E+00 0.00000000E+00
0.00000000E+00 0.00000000E+00 0.00000000E+00
0.00000000E+00 0.00000000E+00 0.00000000E+00
0.00000000E+00 0.00000000E+00 0.00000000E+00
0.00000000E+00 0.00000000E+00 0.00000000E+00
0.00000000E+00 0.00000000E+00 0.00000000E+00
0.00000000E+00 0.00000000E+00 0.00000000E+00
0.00000000E+00 0.00000000E+00 0.00000000E+00
0.00000000E+00 0.00000000E+00 0.00000000E+00
0.00000000E+00 0.00000000E+00 0.00000000E+00
0.00000000E+00 0.00000000E+00 0.00000000E+00
0.00000000E+00 0.00000000E+00 0.00000000E+00
0.00000000E+00 0.00000000E+00 0.00000000E+00
0.00000000E+00 0.00000000E+00 0.00000000E+00
0.00000000E+00 0.00000000E+00 0.00000000E+00
0.00000000E+00 0.00000000E+00 0.00000000E+00
0.00000000E+00 0.00000000E+00 0.00000000E+00
0.00000000E+00 0.00000000E+00 0.00000000E+00
0.00000000E+00 0.00000000E+00 0.00000000E+00
0.00000000E+00 0.00000000E+00 0.00000000E+00
0.00000000E+00 0.00000000E+00 0.00000000E+00
0.00000000E+00 0.00000000E+00 0.00000000E+00
0.00000000E+00 0.00000000E+00 0.00000000E+00
0.00000000E+00 0.00000000E+00 0.00000000E+00
0.00000000E+00 0.00000000E+00 0.00000000E+00
0.00000000E+00 0.00000000E+00 0.00000000E+00
0.00000000E+00 0.00000000E+00 0.00000000E+00
0.00000000E+00 0.00000000E+00 0.00000000E+00
0.00000000E+00 0.00000000E+00 0.00000000E+00
0.00000000E+00 0.00000000E+00 0.00000000E+00
0.00000000E+00 0.00000000E+00 0.00000000E+00
0.00000000E+00 0.00000000E+00 0.00000000E+00

## Sheet: 2Fe-BMS
1
10.0131105016176623 0.0000000000000000 -0.0625525933537891
0.0000000000000000 12.7114089654855551 0.0000000000000000
-3.5269577245450909 0.0000000000000000 14.0786317451686074
H O S Mg Fe
96 84 4 22 2
Direct
0.9623693301357249 0.1702232159475536 0.8306735573004539
0.9692438295758781 0.4688282653925789 0.8349700574473370
0.9712112500242546 0.3213804580064590 0.6621340942630527
0.9358954176649195 0.0858038085797067 0.6503334595193780
0.4058376598715087 0.5728148646752608 0.5878202553347706
0.0234880312257534 0.1916723473786867 0.5051340653831601
0.1463497219337756 0.2206550936613700 0.5928633620092799
0.1663726972266928 0.4264544793486365 0.5961886295269769
0.1434730431000010 0.0476741468264416 0.5525984859193972
0.0358095043103643 0.0744705184947656 0.9910992604735543
0.9894602666434139 0.3690549918335891 0.0813511503514259
0.4612713264958236 0.4188304288872149 0.3507241912873205
0.4706618092624099 0.2492742907910871 0.3128549147069313
0.4648722445330418 0.0661149610378328 0.1518303456970335
0.4376647203003071 0.3257725889255668 0.1562890533835966
0.8504803178874963 0.3264911048307503 0.0969948263814716
0.5313311882361089 0.4473983252982989 0.9977242142771617
0.6568055199918712 0.9810235033577330 0.0850811865811844
0.6580913750007608 0.1852824705567070 0.0894462326621958
0.6346115679342276 0.3057012453696162 0.0429497046122992
0.5387168894481899 0.3408869949867893 0.4948725079150345
0.4921617848617352 0.0683014903364748 0.5045836296673422
0.0566551162865557 0.1727898811960879 0.1659213829500688
0.0536139018422206 0.4742687720267699 0.1747434145898901
0.0444734897218648 0.3125146096458589 0.3370903910197755
0.0818419504290889 0.0789152342513751 0.3291144338529627
0.6552702269576640 0.5704245808743367 0.4069495204129858
0.8434868759595540 0.2158358710447978 0.3936048310265942
0.8785393290068091 0.3140598529236727 0.4633634851880756
0.9860807315758991 0.4570093536717044 0.4957795560711423
0.8442206964953435 0.9658887327755350 0.4078024345801058
0.8801677200634458 0.0716424365825000 0.0781315035428864
0.1763204052816025 0.3194156061286817 0.9078182284366355
0.5687163279145588 0.4317484667610740 0.6896090465766822
0.5492998388268283 0.2253096065770696 0.6664870059061176
0.5437069744194135 0.0770862014343572 0.8333854765877392
0.5772564446186835 0.3308529741500190 0.8335017711101590
0.0346579713291930 0.3566745869831388 0.9236977240869648
0.3391274957946939 0.4319139981197343 0.8974664043220489
0.3683411705039966 0.0449868408442348 0.9447600858504432
0.4795926343998570 0.1940780857441961 0.9899099821210323
0.3492764568944938 0.2231023805541808 0.9081582476101459
0.3855587417532867 0.3304065708105655 0.5806256199230683
0.5288045084513612 0.1537282654351863 0.4073348175009041
0.1275626452631548 0.0788988848005658 0.8776038952432329
0.1867829174873411 0.1073247799823127 0.7851340077442042
0.6752970355416883 0.2814200719191354 0.2558583974178621
0.6371777584255854 0.3979084710001751 0.2724270017372513
0.9519077445229669 0.6695037726246880 0.8158841022292348
0.9624273090781151 0.9730210338510217 0.8266547217654450
0.9671727735178052 0.8186108047927576 0.6590758905402663
0.9295984426525871 0.5904207239138453 0.6622124180679840
0.4188486814544333 0.0666172199595346 0.5889315992226904
0.0334635319136628 0.6881801749366528 0.4999712041237993
0.1538272258525495 0.7250323861109985 0.5853550436016335
0.1648750930623327 0.9246508855092269 0.5942267226431834
0.1493747690115783 0.5491764754678957 0.5523546941763372
0.0373644527141680 0.5788720912578406 0.9914775393662278
0.9923194755638052 0.8809624036013624 0.0809678043018236
0.4609548246415525 0.9215931552539482 0.3434086690117242
0.4648225578753182 0.7466765705906210 0.3285536386231678
0.4658673947245708 0.5644771057365965 0.1530608537718207
0.4405995989471189 0.8276559408915408 0.1623818629373921
0.8667951291003084 0.7991643332562588 0.0694790594994371
0.5343335610566011 0.9445314821385383 0.9990461227555463
0.6522974434898958 0.4838077330470079 0.0837066236764687
0.6610105651330782 0.6861713833440551 0.0882480598028774
0.6427061687212025 0.8083933361192878 0.0436512624587687
0.5399645615331178 0.8397539806879416 0.4901278781692986
0.4874446683453331 0.5666278993363455 0.5080688048880700
0.0601514131866823 0.6695676732270713 0.1694394205413599
0.0548701166860249 0.9783149993636373 0.1732776371863477
0.0490309208709104 0.8154207436194270 0.3363231222416562
0.0768407978328539 0.5753710882648981 0.3258710721084778
0.6547761446656208 0.0788738558816729 0.4060006226415966
0.8456522887828897 0.7059190192333816 0.3942628308813269
0.8822137814051112 0.8039745347684673 0.4624947436058248
0.9875068463321622 0.9502521665603251 0.4908163980293415
0.8441715453363671 0.4721299208949739 0.4113378517535443
0.8765921237444178 0.5764953902407308 0.0736261035897195
0.1474844982419426 0.8152865026814620 0.9036661329971825
0.5522367581122665 0.9293013263945049 0.6616927929415878
0.5381506813547506 0.7289177413385222 0.6610284293542820
0.5458334665000164 0.5660285638463142 0.8234003483070962
0.5722129922130097 0.8352060125597075 0.8285324681613930
0.0359655511052110 0.8149549543205994 0.9664539638529034
0.3355748107279884 0.9270219336546586 0.8972826172899200
0.3689111371313837 0.5503828487620042 0.9452151136335729
0.4820489742400039 0.6998578967936501 0.9888754379017682
0.3456590114247913 0.7286301592393750 0.9101463512609134
0.3879449396251959 0.8303767472144380 0.5784462695625189
0.5281458115705954 0.6434706077657079 0.4091916062731819
0.1212204899670735 0.5840042701222287 0.8795760437911082
0.1770775738324583 0.6105323119575110 0.7846885672837373
0.6751201007429439 0.7818741214765667 0.2579501622384151
0.6418702785232575 0.8988930721511532 0.2762289665555661
0.1477766599608228 0.4714835459505155 0.5376319459703648
0.1220377531709984 0.1714664801828771 0.5377322125490475
0.3649373293731953 0.3240692923764824 0.5113082834560915
0.3999530744970106 0.0638321881826127 0.5197141613961023
0.1798470223309606 0.0766510479005198 0.3614386851466023
0.1433615863018488 0.3233909680333673 0.3513572248074336
0.4028028220749501 0.2026651571957336 0.3306641833705795
0.3650399177821562 0.4395344736692171 0.3276182547248113
0.1683101362207984 0.3245065070632931 0.6694207761672958
0.4152042498149959 0.3598821341039882 0.7147991460199227
0.2942237887054019 0.3225102946730887 0.8364156026216905
0.3296317602514257 0.1818635866123899 0.7317639456080351
0.6415200865111896 0.2283607086030750 0.0300941154104549
0.6328617754761073 0.4348521863725952 0.0284341449236048
0.8693754186657475 0.0786054634413774 0.0100929053602117
0.8948111409339515 0.3418398918385318 0.0459572970747957
0.6753568020635019 0.3256872367029038 0.8636014606650342
0.6434144068131424 0.0743461255784266 0.8548710288534211
0.9118237906732236 0.4175149937400385 0.8571138005135609
0.8665825347496420 0.1885861846318165 0.8274876157741204
0.6674017042911982 0.0842847513259295 0.1596398916513314
0.9090891988564529 0.0369757436401067 0.2291227199327008
0.8140654542693440 0.1979039533366164 0.2772243348473710
0.7379004601480964 0.0266901266005393 0.3226863173414567
0.8844380323609862 0.4403125628262084 0.4751048989816420
0.8734754613291782 0.2345799350445436 0.4623733207805247
0.6347012930313145 0.3463472436535365 0.4897301933028805
0.6110448566777413 0.1146293252006460 0.4517739007036299
0.8370095811637762 0.0809168644435693 0.6229680516143813
0.8707897352170829 0.3249304687070124 0.6456350387416693
0.6440570805118909 0.2069888072265641 0.6687592283182737
0.6589357081141827 0.4523269791264241 0.6812679108689863
0.3795251315689467 0.1755020871954573 0.9643011070321940
0.3732044204093097 0.4727035308583098 0.9575348112648437
0.1333419177351702 0.0724945566461922 0.9862360672082837
0.1319253095003574 0.3293396461700687 0.9608992667441565
0.3379495041733943 0.3216033049176285 0.1279273228346807
0.3647942662394752 0.0679357299926266 0.1402567155383118
0.1227417958508291 0.4318985992817039 0.1553173865836918
0.1546948662326781 0.1855379496875716 0.1759703403434638
0.1058243548782850 0.0814505501080953 0.8044731606157141
0.5967804461433257 0.3309782820352477 0.2450509860167520
0.1479150177851978 0.9703993004715067 0.5364456784473609
0.1351128640531644 0.6750561917312902 0.5300484344718907
0.3680474853253799 0.8227526337453925 0.5097122555708392
0.3929868176319795 0.5691133467844380 0.5189178217434339
0.1742417372960157 0.5748239557962592 0.3589778936017393
0.1486192512377916 0.8221076991492858 0.3540668956756423
0.3977974482331234 0.6956238846658146 0.3405760304476823
0.3637984221093475 0.9412168618967007 0.3243628891050397
0.1663025438602733 0.8181639097734277 0.6646502534079159
0.4112959065695450 0.8574192145455702 0.7198955562977961
0.2764459401786903 0.8181545110438792 0.8341075341201636
0.3275927557124736 0.6781175410794591 0.7329195463925802
0.6506147285369173 0.7305526659695899 0.0300847499491048
0.6355308532960773 0.9324345850184234 0.0295610933134330
0.8652086549805212 0.5829326831792784 0.0053508824294410
0.9071098742460343 0.8467259433545230 0.0310728214530887
0.6698537708597926 0.8258854706516743 0.8599603740185250
0.6454948228652284 0.5690810660988873 0.8468771062088714
0.8681723357961583 0.9522583888626043 0.8246441961392726
0.8580693604632981 0.6903733142358740 0.8189157909762329
0.6615032696270130 0.5859292838476898 0.1585452950077190
0.9029797174985352 0.5362336708198195 0.2201775143782791
0.8136004986888606 0.6948330363708929 0.2773984584462782
0.7384903352407053 0.5213373666773727 0.3190731565158347
0.8870854453108425 0.9300358270179399 0.4691967146425290
0.8769874270101435 0.7241481172660501 0.4631320978225879
0.6344968651492882 0.8439529131785500 0.4810470431365980
0.6126945617134608 0.6064061111722037 0.4531063785315217
0.8317428138729526 0.5843231120699718 0.6308425106988895
0.8667897076697402 0.8223174027872385 0.6416098051048938
0.6321856163078479 0.7127029083682782 0.6593423862073214
0.6463945285552223 0.9520071991232785 0.6675507526594605
0.3824410886567884 0.6809227601944380 0.9659230422406393
0.3724577170576187 0.9672245541194124 0.9573690462113281
0.1345375372407216 0.5765685752336522 0.9864044202754935
0.1356547109293142 0.8174388872980922 0.9692068406766282
0.3411918370827094 0.8226876507904446 0.1320940936084730
0.3657408428020988 0.5666372947703072 0.1414760160021323
0.1124404553964948 0.9283808108189625 0.1497644102792724
0.1565421075255496 0.6867595074156410 0.1769643721514130
0.0953995895007213 0.5884059937010317 0.8054146229958808
0.5989063457734696 0.8331907576924938 0.2478882497754244
0.3033382977833805 0.2956109794536784 0.7370367043550784
0.7846774815914271 0.0860984568229594 0.2470027607135697
0.2978112092246579 0.7917065270730587 0.7371995802246817
0.7819161676598652 0.5844502103278906 0.2439793498954349
0.2571434525280250 0.4420154452967623 0.4319765271253118
0.7617029327119151 0.1920701692152329 0.9301179133421977
0.7732702738670717 0.4526819644438660 0.9354570096267514
0.7428581473999112 0.0770076632676965 0.7429141048615702
0.7590131441811351 0.4435091147682735 0.5748645919666114
0.7379298505484728 0.2160400488016790 0.5579590643543192
0.7835689688241416 0.3202448817476197 0.7582945574874513
0.2446932953084015 0.1900213038946433 0.0609703743518117
0.2412222199015006 0.4515490257841585 0.0574262341042996
0.2962934214460517 0.0816808386089736 0.2586777975946248
0.2643359765542891 0.9423508990877414 0.4346525077545580
0.2654336694180351 0.7038260554828640 0.4356051840084366
0.2370335738455671 0.8252453660402881 0.2400426086976183
0.7497914569164896 0.6900400576121862 0.9204190996692706
0.7675751398345474 0.9565957361082454 0.9316820880836619
0.7583379401813444 0.9423508401806866 0.5681952446581980
0.7345612177008026 0.7160423932162313 0.5538837727143278
0.7676322455040285 0.8271821707442519 0.7484134769882108
0.2537091749524186 0.6890298191840331 0.0648617271893310
0.2453980999057991 0.9520820792995333 0.0590490735915728
0.2909517596077532 0.5754729297351278 0.2576665311742696
0.2407040032118700 0.3226164071683567 0.2415300697959138
0.2640326688898298 0.2049171261823511 0.4410862944970483
0.7335300778035784 0.5842010512651872 0.7374554586281850
0.00000000E+00 0.00000000E+00 0.00000000E+00
0.00000000E+00 0.00000000E+00 0.00000000E+00
0.00000000E+00 0.00000000E+00 0.00000000E+00
0.00000000E+00 0.00000000E+00 0.00000000E+00
0.00000000E+00 0.00000000E+00 0.00000000E+00
0.00000000E+00 0.00000000E+00 0.00000000E+00
0.00000000E+00 0.00000000E+00 0.00000000E+00
0.00000000E+00 0.00000000E+00 0.00000000E+00
0.00000000E+00 0.00000000E+00 0.00000000E+00
0.00000000E+00 0.00000000E+00 0.00000000E+00
0.00000000E+00 0.00000000E+00 0.00000000E+00
0.00000000E+00 0.00000000E+00 0.00000000E+00
0.00000000E+00 0.00000000E+00 0.00000000E+00
0.00000000E+00 0.00000000E+00 0.00000000E+00
0.00000000E+00 0.00000000E+00 0.00000000E+00
0.00000000E+00 0.00000000E+00 0.00000000E+00
0.00000000E+00 0.00000000E+00 0.00000000E+00
0.00000000E+00 0.00000000E+00 0.00000000E+00
0.00000000E+00 0.00000000E+00 0.00000000E+00
0.00000000E+00 0.00000000E+00 0.00000000E+00
0.00000000E+00 0.00000000E+00 0.00000000E+00
0.00000000E+00 0.00000000E+00 0.00000000E+00
0.00000000E+00 0.00000000E+00 0.00000000E+00
0.00000000E+00 0.00000000E+00 0.00000000E+00
0.00000000E+00 0.00000000E+00 0.00000000E+00
0.00000000E+00 0.00000000E+00 0.00000000E+00
0.00000000E+00 0.00000000E+00 0.00000000E+00
0.00000000E+00 0.00000000E+00 0.00000000E+00
0.00000000E+00 0.00000000E+00 0.00000000E+00
0.00000000E+00 0.00000000E+00 0.00000000E+00
0.00000000E+00 0.00000000E+00 0.00000000E+00
0.00000000E+00 0.00000000E+00 0.00000000E+00
0.00000000E+00 0.00000000E+00 0.00000000E+00
0.00000000E+00 0.00000000E+00 0.00000000E+00
0.00000000E+00 0.00000000E+00 0.00000000E+00
0.00000000E+00 0.00000000E+00 0.00000000E+00
0.00000000E+00 0.00000000E+00 0.00000000E+00
0.00000000E+00 0.00000000E+00 0.00000000E+00
0.00000000E+00 0.00000000E+00 0.00000000E+00
0.00000000E+00 0.00000000E+00 0.00000000E+00
0.00000000E+00 0.00000000E+00 0.00000000E+00
0.00000000E+00 0.00000000E+00 0.00000000E+00
0.00000000E+00 0.00000000E+00 0.00000000E+00
0.00000000E+00 0.00000000E+00 0.00000000E+00
0.00000000E+00 0.00000000E+00 0.00000000E+00
0.00000000E+00 0.00000000E+00 0.00000000E+00
0.00000000E+00 0.00000000E+00 0.00000000E+00
0.00000000E+00 0.00000000E+00 0.00000000E+00
0.00000000E+00 0.00000000E+00 0.00000000E+00
0.00000000E+00 0.00000000E+00 0.00000000E+00
0.00000000E+00 0.00000000E+00 0.00000000E+00
0.00000000E+00 0.00000000E+00 0.00000000E+00
0.00000000E+00 0.00000000E+00 0.00000000E+00
0.00000000E+00 0.00000000E+00 0.00000000E+00
0.00000000E+00 0.00000000E+00 0.00000000E+00
0.00000000E+00 0.00000000E+00 0.00000000E+00
0.00000000E+00 0.00000000E+00 0.00000000E+00
0.00000000E+00 0.00000000E+00 0.00000000E+00
0.00000000E+00 0.00000000E+00 0.00000000E+00
0.00000000E+00 0.00000000E+00 0.00000000E+00
0.00000000E+00 0.00000000E+00 0.00000000E+00
0.00000000E+00 0.00000000E+00 0.00000000E+00
0.00000000E+00 0.00000000E+00 0.00000000E+00
0.00000000E+00 0.00000000E+00 0.00000000E+00
0.00000000E+00 0.00000000E+00 0.00000000E+00
0.00000000E+00 0.00000000E+00 0.00000000E+00
0.00000000E+00 0.00000000E+00 0.00000000E+00
0.00000000E+00 0.00000000E+00 0.00000000E+00
0.00000000E+00 0.00000000E+00 0.00000000E+00
0.00000000E+00 0.00000000E+00 0.00000000E+00
0.00000000E+00 0.00000000E+00 0.00000000E+00
0.00000000E+00 0.00000000E+00 0.00000000E+00
0.00000000E+00 0.00000000E+00 0.00000000E+00
0.00000000E+00 0.00000000E+00 0.00000000E+00
0.00000000E+00 0.00000000E+00 0.00000000E+00
0.00000000E+00 0.00000000E+00 0.00000000E+00
0.00000000E+00 0.00000000E+00 0.00000000E+00
0.00000000E+00 0.00000000E+00 0.00000000E+00
0.00000000E+00 0.00000000E+00 0.00000000E+00
0.00000000E+00 0.00000000E+00 0.00000000E+00
0.00000000E+00 0.00000000E+00 0.00000000E+00
0.00000000E+00 0.00000000E+00 0.00000000E+00
0.00000000E+00 0.00000000E+00 0.00000000E+00
0.00000000E+00 0.00000000E+00 0.00000000E+00
0.00000000E+00 0.00000000E+00 0.00000000E+00
0.00000000E+00 0.00000000E+00 0.00000000E+00
0.00000000E+00 0.00000000E+00 0.00000000E+00
0.00000000E+00 0.00000000E+00 0.00000000E+00
0.00000000E+00 0.00000000E+00 0.00000000E+00
0.00000000E+00 0.00000000E+00 0.00000000E+00
0.00000000E+00 0.00000000E+00 0.00000000E+00
0.00000000E+00 0.00000000E+00 0.00000000E+00
0.00000000E+00 0.00000000E+00 0.00000000E+00
0.00000000E+00 0.00000000E+00 0.00000000E+00
0.00000000E+00 0.00000000E+00 0.00000000E+00
0.00000000E+00 0.00000000E+00 0.00000000E+00
0.00000000E+00 0.00000000E+00 0.00000000E+00
0.00000000E+00 0.00000000E+00 0.00000000E+00
0.00000000E+00 0.00000000E+00 0.00000000E+00
0.00000000E+00 0.00000000E+00 0.00000000E+00
0.00000000E+00 0.00000000E+00 0.00000000E+00
0.00000000E+00 0.00000000E+00 0.00000000E+00
0.00000000E+00 0.00000000E+00 0.00000000E+00
0.00000000E+00 0.00000000E+00 0.00000000E+00
0.00000000E+00 0.00000000E+00 0.00000000E+00
0.00000000E+00 0.00000000E+00 0.00000000E+00
0.00000000E+00 0.00000000E+00 0.00000000E+00
0.00000000E+00 0.00000000E+00 0.00000000E+00
0.00000000E+00 0.00000000E+00 0.00000000E+00
0.00000000E+00 0.00000000E+00 0.00000000E+00
0.00000000E+00 0.00000000E+00 0.00000000E+00
0.00000000E+00 0.00000000E+00 0.00000000E+00
0.00000000E+00 0.00000000E+00 0.00000000E+00
0.00000000E+00 0.00000000E+00 0.00000000E+00
0.00000000E+00 0.00000000E+00 0.00000000E+00
0.00000000E+00 0.00000000E+00 0.00000000E+00
0.00000000E+00 0.00000000E+00 0.00000000E+00
0.00000000E+00 0.00000000E+00 0.00000000E+00
0.00000000E+00 0.00000000E+00 0.00000000E+00
0.00000000E+00 0.00000000E+00 0.00000000E+00
0.00000000E+00 0.00000000E+00 0.00000000E+00
0.00000000E+00 0.00000000E+00 0.00000000E+00
0.00000000E+00 0.00000000E+00 0.00000000E+00
0.00000000E+00 0.00000000E+00 0.00000000E+00
0.00000000E+00 0.00000000E+00 0.00000000E+00
0.00000000E+00 0.00000000E+00 0.00000000E+00
0.00000000E+00 0.00000000E+00 0.00000000E+00
0.00000000E+00 0.00000000E+00 0.00000000E+00
0.00000000E+00 0.00000000E+00 0.00000000E+00
0.00000000E+00 0.00000000E+00 0.00000000E+00
0.00000000E+00 0.00000000E+00 0.00000000E+00
0.00000000E+00 0.00000000E+00 0.00000000E+00
0.00000000E+00 0.00000000E+00 0.00000000E+00
0.00000000E+00 0.00000000E+00 0.00000000E+00
0.00000000E+00 0.00000000E+00 0.00000000E+00
0.00000000E+00 0.00000000E+00 0.00000000E+00
0.00000000E+00 0.00000000E+00 0.00000000E+00
0.00000000E+00 0.00000000E+00 0.00000000E+00
0.00000000E+00 0.00000000E+00 0.00000000E+00
0.00000000E+00 0.00000000E+00 0.00000000E+00
0.00000000E+00 0.00000000E+00 0.00000000E+00
0.00000000E+00 0.00000000E+00 0.00000000E+00
0.00000000E+00 0.00000000E+00 0.00000000E+00
0.00000000E+00 0.00000000E+00 0.00000000E+00
0.00000000E+00 0.00000000E+00 0.00000000E+00
0.00000000E+00 0.00000000E+00 0.00000000E+00
0.00000000E+00 0.00000000E+00 0.00000000E+00
0.00000000E+00 0.00000000E+00 0.00000000E+00
0.00000000E+00 0.00000000E+00 0.00000000E+00
0.00000000E+00 0.00000000E+00 0.00000000E+00
0.00000000E+00 0.00000000E+00 0.00000000E+00
0.00000000E+00 0.00000000E+00 0.00000000E+00
0.00000000E+00 0.00000000E+00 0.00000000E+00
0.00000000E+00 0.00000000E+00 0.00000000E+00
0.00000000E+00 0.00000000E+00 0.00000000E+00
0.00000000E+00 0.00000000E+00 0.00000000E+00
0.00000000E+00 0.00000000E+00 0.00000000E+00
0.00000000E+00 0.00000000E+00 0.00000000E+00
0.00000000E+00 0.00000000E+00 0.00000000E+00
0.00000000E+00 0.00000000E+00 0.00000000E+00
0.00000000E+00 0.00000000E+00 0.00000000E+00
0.00000000E+00 0.00000000E+00 0.00000000E+00
0.00000000E+00 0.00000000E+00 0.00000000E+00
0.00000000E+00 0.00000000E+00 0.00000000E+00
0.00000000E+00 0.00000000E+00 0.00000000E+00
0.00000000E+00 0.00000000E+00 0.00000000E+00
0.00000000E+00 0.00000000E+00 0.00000000E+00
0.00000000E+00 0.00000000E+00 0.00000000E+00
0.00000000E+00 0.00000000E+00 0.00000000E+00
0.00000000E+00 0.00000000E+00 0.00000000E+00
0.00000000E+00 0.00000000E+00 0.00000000E+00
0.00000000E+00 0.00000000E+00 0.00000000E+00
0.00000000E+00 0.00000000E+00 0.00000000E+00
0.00000000E+00 0.00000000E+00 0.00000000E+00
0.00000000E+00 0.00000000E+00 0.00000000E+00
0.00000000E+00 0.00000000E+00 0.00000000E+00
0.00000000E+00 0.00000000E+00 0.00000000E+00
0.00000000E+00 0.00000000E+00 0.00000000E+00
0.00000000E+00 0.00000000E+00 0.00000000E+00
0.00000000E+00 0.00000000E+00 0.00000000E+00
0.00000000E+00 0.00000000E+00 0.00000000E+00
0.00000000E+00 0.00000000E+00 0.00000000E+00
0.00000000E+00 0.00000000E+00 0.00000000E+00
0.00000000E+00 0.00000000E+00 0.00000000E+00
0.00000000E+00 0.00000000E+00 0.00000000E+00
0.00000000E+00 0.00000000E+00 0.00000000E+00
0.00000000E+00 0.00000000E+00 0.00000000E+00
0.00000000E+00 0.00000000E+00 0.00000000E+00
0.00000000E+00 0.00000000E+00 0.00000000E+00
0.00000000E+00 0.00000000E+00 0.00000000E+00
0.00000000E+00 0.00000000E+00 0.00000000E+00
0.00000000E+00 0.00000000E+00 0.00000000E+00
0.00000000E+00 0.00000000E+00 0.00000000E+00
0.00000000E+00 0.00000000E+00 0.00000000E+00
0.00000000E+00 0.00000000E+00 0.00000000E+00
0.00000000E+00 0.00000000E+00 0.00000000E+00
0.00000000E+00 0.00000000E+00 0.00000000E+00
0.00000000E+00 0.00000000E+00 0.00000000E+00
0.00000000E+00 0.00000000E+00 0.00000000E+00
0.00000000E+00 0.00000000E+00 0.00000000E+00
0.00000000E+00 0.00000000E+00 0.00000000E+00
0.00000000E+00 0.00000000E+00 0.00000000E+00
0.00000000E+00 0.00000000E+00 0.00000000E+00
0.00000000E+00 0.00000000E+00 0.00000000E+00
0.00000000E+00 0.00000000E+00 0.00000000E+00
0.00000000E+00 0.00000000E+00 0.00000000E+00
0.00000000E+00 0.00000000E+00 0.00000000E+00
0.00000000E+00 0.00000000E+00 0.00000000E+00

## Sheet: vac-origin
1
12.6292514460031455 0.0000000000000000 0.1686392494525426
0.0000000000000000 14.3707479416810937 0.0000000000000000
0.0000000000000000 0.0000000000000000 23.2627559517313713
O S Mg H
84 4 24 96
Direct
0.4689255399359217 0.6704813275876003 0.0707919490521622
0.1884430139431542 0.6668779945263382 0.0663312981983884
0.3289565752766418 0.6129067968118040 0.1749956382452552
0.0850880230053199 0.6406917192714530 0.1786317814535180
0.0800383460486673 0.4983898797420751 0.0927683249049688
0.3262494731405283 0.4939234952150880 0.0827053201805358
0.2000979837966696 0.4325452333046088 0.1804993907593887
0.4460219998347525 0.4336204221656017 0.1741328961971297
0.3147865125463711 0.7995272699556926 0.0886491000891630
0.3535966341472415 0.8100025810617560 0.1912866699304327
0.3071655838004571 0.9483918502624891 0.1377891852273861
0.1719381804287664 0.8303585078256169 0.1580462953809468
0.2286820869666610 0.0978205573511618 0.2859891305249797
0.4352243084542595 0.0936723494021800 0.2819341469963393
0.0819451063246252 0.0314993862934946 0.3809553991878901
0.3431084899262328 0.0503760457032485 0.3894376796434123
0.3337083857231457 0.9185676814202222 0.2975215325239141
0.0872372926420585 0.9148183114797386 0.2869149424230591
0.4622450659286785 0.8521836502414609 0.3822179709023532
0.2045580851214306 0.8547829041630111 0.3829094894927131
0.0789593275659101 0.2230603334596665 0.2921903561428054
-0.0158886778182315 0.2334631015025521 0.3843035559544786
0.1533297124023080 0.3154493968148038 0.3687828092268359
-0.0057554895779366 0.3678269059678851 0.3193772682637022
0.4424743255738054 0.4912330310461658 0.3948891024190479
0.2172714568598279 0.4897249127348258 0.3950150075045569
0.3441683752854385 0.5436836974214144 0.2877724524898750
0.1037526673365304 0.5182999480812910 0.2767060661078026
0.0834260569286125 0.6540803319534234 0.3713462215271674
0.3265335206332686 0.6666583422449336 0.3832366686917213
0.2118566362750854 0.7276370200293574 0.2908101782037044
0.4587178265850725 0.7306932244541515 0.2918090065778244
0.1740524984919176 0.0642600463250332 0.1797893702410356
0.4674342257080424 0.0552926861306610 0.1740300616404950
0.0770783742425836 0.1272409181515653 0.0763885514273228
0.3254571615209664 0.1047956049601659 0.0777059208802969
0.3231482288637654 0.2352347767950998 0.1661759048411265
0.0713511680580341 0.2437337925969123 0.1734837872550281
0.4526870088647727 0.3079635351572153 0.0820714154356009
0.1992240997571185 0.3099071509260589 0.0835803804785920
0.0435259016385458 0.9349864883773761 0.0714159894097484
0.2978826495641813 0.3198095461871568 0.2726840442392254
0.9680884842278661 0.6711666831522305 0.0703315227416248
0.6890151779744788 0.6662772567547947 0.0664484100217766
0.8285602359669643 0.6131009386439987 0.1749442497438622
0.5828521824067115 0.6384589384643302 0.1787146902725980
0.5802815746808816 0.4976795245505953 0.0922879777403284
0.8266828688140569 0.4937749896483485 0.0829891786400604
0.7001996228895033 0.4323443756119564 0.1804779359759466
0.9459637096721685 0.4340083145702399 0.1745327910052869
0.8144847296003914 0.7996669943096006 0.0887556651883980
0.8527765098729502 0.8092120161462276 0.1915169097315063
0.8072224700428555 0.9479862333682768 0.1384556733832155
0.6714034336769138 0.8302459939132031 0.1580709538354849
0.7278546395021862 0.0980062577466170 0.2864502536970934
0.9343941778533614 0.0939895649070070 0.2824199476163207
0.5818985287382398 0.0314933362313038 0.3810607917423911
0.8429704068154049 0.0503885389788017 0.3895163062239455
0.8337057894534285 0.9185652064172741 0.2975711669802522
0.5875431011400291 0.9143345729148882 0.2870602565956065
0.9622287249851667 0.8523135898184439 0.3822000358110191
0.7046326256692700 0.8545490258300847 0.3830642229196443
0.5779326935294692 0.2235462610727776 0.2925070271390809
0.4811762113726446 0.2344320993009299 0.3840593188889233
0.6518896484359030 0.3146813355947053 0.3696506438783701
0.4943603291141216 0.3689179616382942 0.3193106200445098
0.9443909572723755 0.4913399593824173 0.3944583428910941
0.7186692110443770 0.4891648650168324 0.3949008519614158
0.8442127809236237 0.5436605742463823 0.2876643430582627
0.6061473665358876 0.5186713210251801 0.2766542243442699
0.5834070314648711 0.6532644183348861 0.3718780091476419
0.8276039000240544 0.6664476278321861 0.3834131719670273
0.7120386702481399 0.7273184254250742 0.2911305078952177
0.9588163429718201 0.7308652827880983 0.2914740994447448
0.6743581870364757 0.0641787075676175 0.1801034511816377
0.9674335946201273 0.0558381393180825 0.1746243769841830
0.5775543653339589 0.1270913542380078 0.0766201687709802
0.8261221853100393 0.1041330346907672 0.0788040981045225
0.8230474437827580 0.2354868313986370 0.1665769874139588
0.5712316891988606 0.2436681001427789 0.1734998974470297
0.9525606241970324 0.3081128999481579 0.0823956913619885
0.6997206979788474 0.3093823805337251 0.0834751031317096
0.5455343050321668 0.9352036851396844 0.0705979579728564
0.7965073210161736 0.3203287825636646 0.2733669159689706
0.2863411119899754 0.8451848842187808 0.1443250063269844
0.0522520563412237 0.2837807088814120 0.3434131145274003
0.7858475766426180 0.8448907506077753 0.1445656950316145
0.5508244037718502 0.2842604483254558 0.3436641295819695
0.4473172275444439 0.5584409863844372 0.1285573044380045
0.2094928704258838 0.5560317393761477 0.1329847616123480
0.2021489122174533 0.9772267710773889 0.3355850262369989
0.4667366507322990 0.9740244279069539 0.3334459146291002
0.0856955892288538 0.7885987445920709 0.3327312781136538
0.4463046105948875 0.6100444131089273 0.3359949580701152
0.2162413652640044 0.5971618166415451 0.3296052083072879
0.3321629016250868 0.7927189694656880 0.3421985765434197
0.1915016642170299 0.1842866285207999 0.1270724101826023
0.4553251150465291 0.1827519134178009 0.1261287612012417
0.0744962518295682 0.3707932889152011 0.1354269297492323
0.9470656446654886 0.5590955888264775 0.1285854776413411
0.7095293818221985 0.5556787157299928 0.1327306769236759
0.8268421287038047 0.3674268352235046 0.1267579532514591
0.7020881729869246 0.9770876488447315 0.3357812573022136
0.9665696410606708 0.9741515578665095 0.3335244285979619
0.5857923013690591 0.7881827875905556 0.3329969717093821
0.9468587076518793 0.6099467461335897 0.3354295280878926
0.7168834396072556 0.5970019909829460 0.3299622797365673
0.8323501823494037 0.7926047809333503 0.3423050639166471
0.6917360384058415 0.1840642505518017 0.1274532109372613
0.9552144222576217 0.1828318683737216 0.1263847617420733
0.5747920933695316 0.3703857980844849 0.1351123198014659
0.3267564268591117 0.3673737393678490 0.1264649086800277
0.1885763015125328 0.8607745355117403 0.4234829528062860
0.4759959090586896 0.8605206567982548 0.4226640366162463
0.3222786116480899 0.6618870634067783 0.4246034729003855
0.0919716044546906 0.6474240924964360 0.4124092135268575
0.5984489416976496 0.7052162775407297 0.1724421523306393
0.2141817679137187 0.6433689237481534 0.0295778369837589
0.2358526729998117 0.7233325438086488 0.0742208787879855
0.4262452329028023 0.7276128707401106 0.0771879598639345
0.0430047831496032 0.6888164677732599 0.0651530832446642
0.0792104950580944 0.1452703606111838 0.0362838623903184
0.3509935340866253 0.0335248334913397 0.4296141768395099
0.4318672078968195 0.4403709825162367 0.2151381439960585
0.2330181188834487 0.4067545289157092 0.2151908264547339
0.0718458992769985 0.2442811937505985 0.2155268996401385
0.3186352831231071 0.2472308015941563 0.2077110413092889
0.3668602037853050 0.1154858555561646 0.3866130445733220
0.4430069088202455 0.0764353510709171 0.2400672601589682
0.9862835563127195 0.1460719065843855 0.2876824518491339
0.1833689414748178 0.1535763615100493 0.2937292910108479
0.3060284349505819 0.1140597258238695 0.2845652793718510
0.3415528480519924 0.5649195759860596 0.2473664933235016
0.0774451504415507 0.6342300093564218 0.2205417979890427
0.1907980575379466 0.3168954657697181 0.0425900864454452
0.4619446461930483 0.3143926075262210 0.0409917506473259
0.3286243384178106 0.4933321133963759 0.0411891810394142
0.0833678049978879 0.4999512495772266 0.0512378615600020
0.5673703692916316 0.4630597735259467 0.2917432861742494
0.1924804047654062 0.4257503870023590 0.3858029774698568
0.2929741874791776 0.4830330347714928 0.4037818999083591
0.4982965516582640 0.4880412611442643 0.4232355805641649
0.9584115253169835 0.4362124866660847 0.3679331147239230
0.0760810832297319 0.0962826089339827 0.3922136278895785
0.3219293288648139 0.0378447246775614 0.0897948756432313
0.4400148336638672 0.7436448507267159 0.2522799796167755
0.2302745104580748 0.7420497767650680 0.2511827589151901
0.0948064168117271 0.9045763526078019 0.2458457207871152
0.3369348423790186 0.9017539898128416 0.2569351820802250
0.3275634725065081 0.1039513511088368 0.0359802775897912
0.4306173932632968 -0.0002872124659450 0.1589101178011499
0.0464280606619827 0.0450194107650025 0.1747861329990581
0.1945335441752487 0.0755245190824772 0.2210010607730305
0.2202391500614506 0.0113536782967290 0.1661843075982700
0.3353039549487494 0.6791538683983868 0.1833917117248578
0.1373080029728870 0.4940816256247306 0.2404538079865095
0.0638665785823344 0.0016533983834099 0.0733576397832311
0.0887139725919058 0.9024881351456063 0.0986972598753525
0.2491667170974417 0.3167399289793122 0.3060471414151829
0.3644123665591181 0.3446228905544315 0.2882807767379066
0.6891522069091939 0.8598732464372278 0.4237252757009574
0.9763567581668189 0.8604145765228864 0.4226239894426476
0.8238419157610986 0.6614258449751439 0.4247912276739030
0.5922849789884924 0.6465572848893117 0.4129294100313050
0.1017215585766362 0.7071767217771626 0.1717968967020433
0.7144905650998917 0.6433204298801428 0.0295186660459695
0.7361058935834182 0.7229755192133620 0.0744388042064029
0.9256585085591899 0.7283266853193507 0.0771149292108800
0.5438012027307579 0.6880546780987916 0.0652730651414600
0.5800442539527337 0.1449242043674788 0.0364903048780110
0.8512798393376964 0.0335873375234851 0.4296816186422542
0.9316449155362241 0.4412547150434915 0.2154964746862417
0.7328660439971065 0.4061055669697981 0.2151285478316227
0.5712207871135572 0.2445006150946542 0.2155412680844372
0.8184076650956498 0.2471453122279670 0.2081288593072503
0.8670042041069378 0.1153842964915304 0.3865909205912585
0.9421441725751263 0.0766573803788587 0.2405445564649121
0.4865420244337916 0.1461668752334296 0.2873800965598348
0.6824727495525522 0.1536754495445991 0.2942145649629829
0.8051122042604693 0.1144897561415974 0.2851137423387545
0.8414872482151958 0.5649706187934088 0.2472824568648324
0.5767869954081843 0.6305031157268334 0.2205918957512660
0.6911645462815699 0.3162532073899671 0.0424796653546940
0.9616435873956175 0.3145332731400731 0.0413043224193868
0.8287537074225326 0.4929993052976065 0.0414816484873676
0.5831996783819841 0.4991105577578744 0.0507506477283859
0.0663190343126499 0.4620047410556894 0.2918994931688406
0.6930553706213805 0.4253817520934063 0.3859484170408475
0.7944243358599834 0.4822119512656307 0.4034496469167004
0.0006714601460441 0.4888599940094775 0.4225788625015610
0.4568191999878265 0.4365418339565116 0.3680392663008722
0.5760519592885754 0.0962717489766061 0.3923058796653080
0.8223311672779803 0.0371605115419332 0.0909741771915369
0.9396375493634344 0.7443136699836159 0.2520663041145632
0.7303877073844897 0.7418937212910404 0.2515074951049281
0.5949637115295431 0.9041217063970344 0.2459803705965916
0.8367489264741880 0.9017561163953394 0.2569815448013940
0.8276688523665667 0.1031318041716682 0.0370673824203952
0.9312510966536268 0.0001118681537985 0.1593363061687706
0.5462713404929385 0.0441565496951161 0.1742133165237409
0.6941982543933699 0.0753113800064235 0.2214045096780338
0.7206950579070470 0.0112758003362796 0.1666096774827948
0.8343915238669051 0.6793669851532307 0.1834565781113283
0.6401198120919236 0.4938271556208920 0.2406590944937120
0.5652757801842241 0.0019434192361693 0.0731550045733958
0.5893682610175396 0.9023803245298623 0.0983766006928386
0.7479580108815346 0.3170742808207087 0.3067739813997570
0.8633036737113413 0.3447109614763187 0.2888770402097195
0.00000000E+00 0.00000000E+00 0.00000000E+00
0.00000000E+00 0.00000000E+00 0.00000000E+00
0.00000000E+00 0.00000000E+00 0.00000000E+00
0.00000000E+00 0.00000000E+00 0.00000000E+00
0.00000000E+00 0.00000000E+00 0.00000000E+00
0.00000000E+00 0.00000000E+00 0.00000000E+00
0.00000000E+00 0.00000000E+00 0.00000000E+00
0.00000000E+00 0.00000000E+00 0.00000000E+00
0.00000000E+00 0.00000000E+00 0.00000000E+00
0.00000000E+00 0.00000000E+00 0.00000000E+00
0.00000000E+00 0.00000000E+00 0.00000000E+00
0.00000000E+00 0.00000000E+00 0.00000000E+00
0.00000000E+00 0.00000000E+00 0.00000000E+00
0.00000000E+00 0.00000000E+00 0.00000000E+00
0.00000000E+00 0.00000000E+00 0.00000000E+00
0.00000000E+00 0.00000000E+00 0.00000000E+00
0.00000000E+00 0.00000000E+00 0.00000000E+00
0.00000000E+00 0.00000000E+00 0.00000000E+00
0.00000000E+00 0.00000000E+00 0.00000000E+00
0.00000000E+00 0.00000000E+00 0.00000000E+00
0.00000000E+00 0.00000000E+00 0.00000000E+00
0.00000000E+00 0.00000000E+00 0.00000000E+00
0.00000000E+00 0.00000000E+00 0.00000000E+00
0.00000000E+00 0.00000000E+00 0.00000000E+00
0.00000000E+00 0.00000000E+00 0.00000000E+00
0.00000000E+00 0.00000000E+00 0.00000000E+00
0.00000000E+00 0.00000000E+00 0.00000000E+00
0.00000000E+00 0.00000000E+00 0.00000000E+00
0.00000000E+00 0.00000000E+00 0.00000000E+00
0.00000000E+00 0.00000000E+00 0.00000000E+00
0.00000000E+00 0.00000000E+00 0.00000000E+00
0.00000000E+00 0.00000000E+00 0.00000000E+00
0.00000000E+00 0.00000000E+00 0.00000000E+00
0.00000000E+00 0.00000000E+00 0.00000000E+00
0.00000000E+00 0.00000000E+00 0.00000000E+00
0.00000000E+00 0.00000000E+00 0.00000000E+00
0.00000000E+00 0.00000000E+00 0.00000000E+00
0.00000000E+00 0.00000000E+00 0.00000000E+00
0.00000000E+00 0.00000000E+00 0.00000000E+00
0.00000000E+00 0.00000000E+00 0.00000000E+00
0.00000000E+00 0.00000000E+00 0.00000000E+00
0.00000000E+00 0.00000000E+00 0.00000000E+00
0.00000000E+00 0.00000000E+00 0.00000000E+00
0.00000000E+00 0.00000000E+00 0.00000000E+00
0.00000000E+00 0.00000000E+00 0.00000000E+00
0.00000000E+00 0.00000000E+00 0.00000000E+00
0.00000000E+00 0.00000000E+00 0.00000000E+00
0.00000000E+00 0.00000000E+00 0.00000000E+00
0.00000000E+00 0.00000000E+00 0.00000000E+00
0.00000000E+00 0.00000000E+00 0.00000000E+00
0.00000000E+00 0.00000000E+00 0.00000000E+00
0.00000000E+00 0.00000000E+00 0.00000000E+00
0.00000000E+00 0.00000000E+00 0.00000000E+00
0.00000000E+00 0.00000000E+00 0.00000000E+00
0.00000000E+00 0.00000000E+00 0.00000000E+00
0.00000000E+00 0.00000000E+00 0.00000000E+00
0.00000000E+00 0.00000000E+00 0.00000000E+00
0.00000000E+00 0.00000000E+00 0.00000000E+00
0.00000000E+00 0.00000000E+00 0.00000000E+00
0.00000000E+00 0.00000000E+00 0.00000000E+00
0.00000000E+00 0.00000000E+00 0.00000000E+00
0.00000000E+00 0.00000000E+00 0.00000000E+00
0.00000000E+00 0.00000000E+00 0.00000000E+00
0.00000000E+00 0.00000000E+00 0.00000000E+00
0.00000000E+00 0.00000000E+00 0.00000000E+00
0.00000000E+00 0.00000000E+00 0.00000000E+00
0.00000000E+00 0.00000000E+00 0.00000000E+00
0.00000000E+00 0.00000000E+00 0.00000000E+00
0.00000000E+00 0.00000000E+00 0.00000000E+00
0.00000000E+00 0.00000000E+00 0.00000000E+00
0.00000000E+00 0.00000000E+00 0.00000000E+00
0.00000000E+00 0.00000000E+00 0.00000000E+00
0.00000000E+00 0.00000000E+00 0.00000000E+00
0.00000000E+00 0.00000000E+00 0.00000000E+00
0.00000000E+00 0.00000000E+00 0.00000000E+00
0.00000000E+00 0.00000000E+00 0.00000000E+00
0.00000000E+00 0.00000000E+00 0.00000000E+00
0.00000000E+00 0.00000000E+00 0.00000000E+00
0.00000000E+00 0.00000000E+00 0.00000000E+00
0.00000000E+00 0.00000000E+00 0.00000000E+00
0.00000000E+00 0.00000000E+00 0.00000000E+00
0.00000000E+00 0.00000000E+00 0.00000000E+00
0.00000000E+00 0.00000000E+00 0.00000000E+00
0.00000000E+00 0.00000000E+00 0.00000000E+00
0.00000000E+00 0.00000000E+00 0.00000000E+00
0.00000000E+00 0.00000000E+00 0.00000000E+00
0.00000000E+00 0.00000000E+00 0.00000000E+00
0.00000000E+00 0.00000000E+00 0.00000000E+00
0.00000000E+00 0.00000000E+00 0.00000000E+00
0.00000000E+00 0.00000000E+00 0.00000000E+00
0.00000000E+00 0.00000000E+00 0.00000000E+00
0.00000000E+00 0.00000000E+00 0.00000000E+00
0.00000000E+00 0.00000000E+00 0.00000000E+00
0.00000000E+00 0.00000000E+00 0.00000000E+00
0.00000000E+00 0.00000000E+00 0.00000000E+00
0.00000000E+00 0.00000000E+00 0.00000000E+00
0.00000000E+00 0.00000000E+00 0.00000000E+00
0.00000000E+00 0.00000000E+00 0.00000000E+00
0.00000000E+00 0.00000000E+00 0.00000000E+00
0.00000000E+00 0.00000000E+00 0.00000000E+00
0.00000000E+00 0.00000000E+00 0.00000000E+00
0.00000000E+00 0.00000000E+00 0.00000000E+00
0.00000000E+00 0.00000000E+00 0.00000000E+00
0.00000000E+00 0.00000000E+00 0.00000000E+00
0.00000000E+00 0.00000000E+00 0.00000000E+00
0.00000000E+00 0.00000000E+00 0.00000000E+00
0.00000000E+00 0.00000000E+00 0.00000000E+00
0.00000000E+00 0.00000000E+00 0.00000000E+00
0.00000000E+00 0.00000000E+00 0.00000000E+00
0.00000000E+00 0.00000000E+00 0.00000000E+00
0.00000000E+00 0.00000000E+00 0.00000000E+00
0.00000000E+00 0.00000000E+00 0.00000000E+00
0.00000000E+00 0.00000000E+00 0.00000000E+00
0.00000000E+00 0.00000000E+00 0.00000000E+00
0.00000000E+00 0.00000000E+00 0.00000000E+00
0.00000000E+00 0.00000000E+00 0.00000000E+00
0.00000000E+00 0.00000000E+00 0.00000000E+00
0.00000000E+00 0.00000000E+00 0.00000000E+00
0.00000000E+00 0.00000000E+00 0.00000000E+00
0.00000000E+00 0.00000000E+00 0.00000000E+00
0.00000000E+00 0.00000000E+00 0.00000000E+00
0.00000000E+00 0.00000000E+00 0.00000000E+00
0.00000000E+00 0.00000000E+00 0.00000000E+00
0.00000000E+00 0.00000000E+00 0.00000000E+00
0.00000000E+00 0.00000000E+00 0.00000000E+00
0.00000000E+00 0.00000000E+00 0.00000000E+00
0.00000000E+00 0.00000000E+00 0.00000000E+00
0.00000000E+00 0.00000000E+00 0.00000000E+00
0.00000000E+00 0.00000000E+00 0.00000000E+00
0.00000000E+00 0.00000000E+00 0.00000000E+00
0.00000000E+00 0.00000000E+00 0.00000000E+00
0.00000000E+00 0.00000000E+00 0.00000000E+00
0.00000000E+00 0.00000000E+00 0.00000000E+00
0.00000000E+00 0.00000000E+00 0.00000000E+00
0.00000000E+00 0.00000000E+00 0.00000000E+00
0.00000000E+00 0.00000000E+00 0.00000000E+00
0.00000000E+00 0.00000000E+00 0.00000000E+00
0.00000000E+00 0.00000000E+00 0.00000000E+00
0.00000000E+00 0.00000000E+00 0.00000000E+00
0.00000000E+00 0.00000000E+00 0.00000000E+00
0.00000000E+00 0.00000000E+00 0.00000000E+00
0.00000000E+00 0.00000000E+00 0.00000000E+00
0.00000000E+00 0.00000000E+00 0.00000000E+00
0.00000000E+00 0.00000000E+00 0.00000000E+00
0.00000000E+00 0.00000000E+00 0.00000000E+00
0.00000000E+00 0.00000000E+00 0.00000000E+00
0.00000000E+00 0.00000000E+00 0.00000000E+00
0.00000000E+00 0.00000000E+00 0.00000000E+00
0.00000000E+00 0.00000000E+00 0.00000000E+00
0.00000000E+00 0.00000000E+00 0.00000000E+00
0.00000000E+00 0.00000000E+00 0.00000000E+00
0.00000000E+00 0.00000000E+00 0.00000000E+00
0.00000000E+00 0.00000000E+00 0.00000000E+00
0.00000000E+00 0.00000000E+00 0.00000000E+00
0.00000000E+00 0.00000000E+00 0.00000000E+00
0.00000000E+00 0.00000000E+00 0.00000000E+00
0.00000000E+00 0.00000000E+00 0.00000000E+00
0.00000000E+00 0.00000000E+00 0.00000000E+00
0.00000000E+00 0.00000000E+00 0.00000000E+00
0.00000000E+00 0.00000000E+00 0.00000000E+00
0.00000000E+00 0.00000000E+00 0.00000000E+00
0.00000000E+00 0.00000000E+00 0.00000000E+00
0.00000000E+00 0.00000000E+00 0.00000000E+00
0.00000000E+00 0.00000000E+00 0.00000000E+00
0.00000000E+00 0.00000000E+00 0.00000000E+00
0.00000000E+00 0.00000000E+00 0.00000000E+00
0.00000000E+00 0.00000000E+00 0.00000000E+00
0.00000000E+00 0.00000000E+00 0.00000000E+00
0.00000000E+00 0.00000000E+00 0.00000000E+00
0.00000000E+00 0.00000000E+00 0.00000000E+00
0.00000000E+00 0.00000000E+00 0.00000000E+00
0.00000000E+00 0.00000000E+00 0.00000000E+00
0.00000000E+00 0.00000000E+00 0.00000000E+00
0.00000000E+00 0.00000000E+00 0.00000000E+00
0.00000000E+00 0.00000000E+00 0.00000000E+00
0.00000000E+00 0.00000000E+00 0.00000000E+00
0.00000000E+00 0.00000000E+00 0.00000000E+00
0.00000000E+00 0.00000000E+00 0.00000000E+00
0.00000000E+00 0.00000000E+00 0.00000000E+00
0.00000000E+00 0.00000000E+00 0.00000000E+00
0.00000000E+00 0.00000000E+00 0.00000000E+00
0.00000000E+00 0.00000000E+00 0.00000000E+00
0.00000000E+00 0.00000000E+00 0.00000000E+00
0.00000000E+00 0.00000000E+00 0.00000000E+00
0.00000000E+00 0.00000000E+00 0.00000000E+00
0.00000000E+00 0.00000000E+00 0.00000000E+00
0.00000000E+00 0.00000000E+00 0.00000000E+00
0.00000000E+00 0.00000000E+00 0.00000000E+00
0.00000000E+00 0.00000000E+00 0.00000000E+00
0.00000000E+00 0.00000000E+00 0.00000000E+00
0.00000000E+00 0.00000000E+00 0.00000000E+00
0.00000000E+00 0.00000000E+00 0.00000000E+00
0.00000000E+00 0.00000000E+00 0.00000000E+00
0.00000000E+00 0.00000000E+00 0.00000000E+00
0.00000000E+00 0.00000000E+00 0.00000000E+00
0.00000000E+00 0.00000000E+00 0.00000000E+00
0.00000000E+00 0.00000000E+00 0.00000000E+00
0.00000000E+00 0.00000000E+00 0.00000000E+00
0.00000000E+00 0.00000000E+00 0.00000000E+00
0.00000000E+00 0.00000000E+00 0.00000000E+00
0.00000000E+00 0.00000000E+00 0.00000000E+00
0.00000000E+00 0.00000000E+00 0.00000000E+00
0.00000000E+00 0.00000000E+00 0.00000000E+00
0.00000000E+00 0.00000000E+00 0.00000000E+00
0.00000000E+00 0.00000000E+00 0.00000000E+00
0.00000000E+00 0.00000000E+00 0.00000000E+00
0.00000000E+00 0.00000000E+00 0.00000000E+00
0.00000000E+00 0.00000000E+00 0.00000000E+00

## Sheet: vac-1Fe-BMS
1
12.6390814408595116 0.0000000000000000 0.0775261368379618
0.0000000000000000 14.3837033237653831 0.0000000000000000
0.0000000000000000 0.0000000000000000 22.4444486503533156
Fe H S Mg O
1 96 4 23 84
Direct
0.5898468978175470 0.7862496953687100 0.3348898045992618
0.1927438098286159 0.8596347863879816 0.4289197039239780
0.4813740345155285 0.8561298983973972 0.4281674787832431
0.3280886713670829 0.6616702357821861 0.4309217478238057
0.0919953124203674 0.6513773041837269 0.4191204384153268
0.6017694774346581 0.7099486529230462 0.1696000890531298
0.2114764340123168 0.6430463043854616 0.0224359012664972
0.2324804444883379 0.7260714474938563 0.0664540078828407
0.4222805435937336 0.7305513315118082 0.0699520872946436
0.0390379879771064 0.6920166566393395 0.0583325578909400
0.0745756829462237 0.1481202728803436 0.0287585901498170
0.3559391217888110 0.0325971459816681 0.4358539383138376
0.4287125358061930 0.4451715695682931 0.2153606454837167
0.2304274043242357 0.4136056347291920 0.2156677622505179
0.0702106103056708 0.2464105038083887 0.2149190355820803
0.3161877192909616 0.2499817698749087 0.2069692839761762
0.3716029392747792 0.1148705459524402 0.3916505315434586
0.4423747099424040 0.0771452524092380 0.2402269913536181
0.9899388446653851 0.1446210305080002 0.2889757875128154
0.1853052939390616 0.1527311387345185 0.2956364464211432
0.3078315984064250 0.1135672518442862 0.2860442528288820
0.3401794001116368 0.5668118177242722 0.2477808912199896
0.0738734003668313 0.6483286636480576 0.2208296729367340
0.1861626053491582 0.3217454387374540 0.0361341216910932
0.4573231628506325 0.3188461028094082 0.0348442734899688
0.3239734283567614 0.4958283107519882 0.0350243935451993
0.0805427365139895 0.5040748791207511 0.0456041331787813
0.5693842369316069 0.4594916857506345 0.2956448023860938
0.1946153613819851 0.4248028917451246 0.3910117581439702
0.2948114991234948 0.4820795988085678 0.4102790770995728
0.4962861466612160 0.4874664373384159 0.4308925522367308
0.9633322630430132 0.4339555436929818 0.3732402528261590
0.0804732296796878 0.0940262986574831 0.3970638159435920
0.3177925042288625 0.0396686320246427 0.0859454173868554
0.4418072952984387 0.7430540496363759 0.2515914121764853
0.2329098567544205 0.7380107163676146 0.2507932020795602
0.0961585318972153 0.9035858978970133 0.2446667731640803
0.3392829069200569 0.9016924335376794 0.2563216410567331
0.3216550524591733 0.1053577685473693 0.0299053642922744
0.4316512310568634 0.0029501952735465 0.1553504007657341
0.0449792213876460 0.0499471984961273 0.1720194939927300
0.1937541048373572 0.0772513961901162 0.2202946475234568
0.2165592440206811 0.0136933567136417 0.1631344740150830
0.3353193632980173 0.6843559009242712 0.1803354332517284
0.1297351016342212 0.4997112741222657 0.2423914813555356
0.0583511876942146 0.0044810511385963 0.0694288179934770
0.0838753859129189 0.9050123958576116 0.0956704572202325
0.2507399052639875 0.3167917046956438 0.3088783388828325
0.3656973285812793 0.3439737556581746 0.2900550156121576
0.6940034554264992 0.8565274324747346 0.4296095323491369
0.9816311196251961 0.8584425316121259 0.4279490581468507
0.8335321827141227 0.6569100471550104 0.4293087538945743
0.5956861244011216 0.6444306587660616 0.4187329403453098
0.1031968062620572 0.7128896783591362 0.1673955948096198
0.7096478768991696 0.6445513150975958 0.0215308459954636
0.7310297517263438 0.7258682242175578 0.0668806545258597
0.9215437809506315 0.7314376510341715 0.0701311336075169
0.5396485924342027 0.6904419958456366 0.0584433148412771
0.5737220321248528 0.1466529648170842 0.0289943856431684
0.8534992143827294 0.0324830760103630 0.4360236571730078
0.9268503824386165 0.4472503404796100 0.2148822235320586
0.7323607144872245 0.4102134285159030 0.2144231317643781
0.5702477929827141 0.2460948552604831 0.2148298789271262
0.8164522851262247 0.2505733490223968 0.2063205459932317
0.8732749883263041 0.1144373152175409 0.3919197395374973
0.9433557581773060 0.0767329242703313 0.2396949553939249
0.4877716181988112 0.1459559665918118 0.2892988322295406
0.6865097996592043 0.1536380764422013 0.2957633178210072
0.8091353480493212 0.1146643798784834 0.2861202956016450
0.8418713451621977 0.5662056490427472 0.2463446716629402
0.5769165040991516 0.6385237222773419 0.2207464836837175
0.6856504683437136 0.3204936329550822 0.0356201832112106
0.9584126850628412 0.3199560775772343 0.0346669112371172
0.8240431780552659 0.4967116516583815 0.0342260364609316
0.5795499321353678 0.5025031619779440 0.0451899452896018
0.0681558390533935 0.4595566929615201 0.2966367668299699
0.7001899203470490 0.4221642300785056 0.3916281889142897
0.8018038227132405 0.4789182656250520 0.4101367901760015
0.0109699386353992 0.4893782907490779 0.4274843574670221
0.4577814064718649 0.4333484708303699 0.3738034192273810
0.5805361056245608 0.0948681811957014 0.3970543343317999
0.8176541307218127 0.0395506768927240 0.0860367183895524
0.9405873324150047 0.7441664554750407 0.2507952888277101
0.7317184923994068 0.7397086830609804 0.2510109984083166
0.5962728556865604 0.9034948251675066 0.2447560336001891
0.8400636008411342 0.9013077394737651 0.2564922405538196
0.8213952067963173 0.1045395189092649 0.0297195568716380
0.9321045309523459 0.0035878115018413 0.1545952626177906
0.5447452390369908 0.0492507164977050 0.1728827391922250
0.6941016864794477 0.0777323966403144 0.2205106215542417
0.7164370902048371 0.0137058296442922 0.1635966751173878
0.8342885550129726 0.6841080488043366 0.1802113806117570
0.6349487227727122 0.4939354906711783 0.2409299189022318
0.5588843521547713 0.0041284755600653 0.0699735832554391
0.5836174565680775 0.9046933401552676 0.0964931141674040
0.7506272255399019 0.3179394552316355 0.3072208991444829
0.8654815169086573 0.3456361146807738 0.2885382334858020
0.2849458978196185 0.8471536015218906 0.1386341344800726
0.0551809034306958 0.2821168980590307 0.3471830868260220
0.7842471662213817 0.8469376392245440 0.1396387418422815
0.5560788409014970 0.2828657018999588 0.3474949350208585
0.4443614829725896 0.5619134395226324 0.1249484663997338
0.2068448431390916 0.5603726344486923 0.1305603664943969
0.2054384619647133 0.9757283297681105 0.3378215387732059
0.4698917474219195 0.9736648844585101 0.3361326441267927
0.0890128528922410 0.7876904034254762 0.3347914453320119
0.4492034059317810 0.6062705834623391 0.3384250593055838
0.2184933881772332 0.5966445352215303 0.3341143602454696
0.3345021373319054 0.7911138515642653 0.3449287902514709
0.1881226416861470 0.1876925603951876 0.1231472659218666
0.4516049909121587 0.1861285109313821 0.1224074094848030
0.0711560480233229 0.3749560245951384 0.1328669992095792
0.9440918396308896 0.5626832960975459 0.1244714524133219
0.7068737450098347 0.5593116068604828 0.1295438753138110
0.8232727496671683 0.3711542761867569 0.1226957717637240
0.7061767416418339 0.9765035965557917 0.3382199162029417
0.9699640358309837 0.9727475968245293 0.3360492043211405
0.9528798266536894 0.6066432505909863 0.3360000615095626
0.7214588873787516 0.5924958154208748 0.3332564467508646
0.8378208537173037 0.7903185455325836 0.3453024295162964
0.6882037543927129 0.1871738429619871 0.1229840576023923
0.9518955752579539 0.1869245795708726 0.1220053099652778
0.5713464758484020 0.3738188985342160 0.1323834881794181
0.3231286323738101 0.3710456935721131 0.1235472992999795
0.4648857344091923 0.6731977873890339 0.0645092598293779
0.1851461697431128 0.6692935486939852 0.0595386671469997
0.3277195181224140 0.6178533456595996 0.1727347202173587
0.0844113947285700 0.6475892114731537 0.1774131798094181
0.0773065673861980 0.5023958159506355 0.0886539302716832
0.3226004217069121 0.4976418695739151 0.0780396394288438
0.1967004950900179 0.4375810149177598 0.1794143349872604
0.4430102075926289 0.4374692708646999 0.1729637524481435
0.3115374036540862 0.8042792499748002 0.0797573982205159
0.3543673317035284 0.8109362543597569 0.1862395563300548
0.3035787283153825 0.9505677858190394 0.1340435243500495
0.1712294304566201 0.8304758282301774 0.1534395833972780
0.2304759633224673 0.0972272911859059 0.2870567730887735
0.4360676430423027 0.0937824779896793 0.2838566048963905
0.0861647988613574 0.0294235621074221 0.3851259330471452
0.3476354522828771 0.0499004819606040 0.3942889234227300
0.3370351933120453 0.9168277443614250 0.2986479939496295
0.0898022605702107 0.9132669174083290 0.2873128141330742
0.4633032926507902 0.8521160751187979 0.3864572608846030
0.2079620109412794 0.8532235856093572 0.3868759530051913
0.0811429166079019 0.2218357170258623 0.2939429745602194
-0.0111383833917420 0.2312558353930509 0.3898490858389160
0.1567645778642741 0.3145374795793016 0.3728579953742641
-0.0041359017416343 0.3656549718374083 0.3225805899065108
0.4410996462986984 0.4884036744755157 0.4008869538796941
0.2189296857809885 0.4886543102067895 0.4011057466105198
0.3435506870395658 0.5426494447424158 0.2889813187495329
0.1013267763957271 0.5186370677219031 0.2821773471231220
0.0864373812441455 0.6551578509980883 0.3762269098733303
0.3318014238988166 0.6653931367451693 0.3880028627344653
0.2151445890068517 0.7262004371026732 0.2922099273571672
0.4588670161174427 0.7274048686505487 0.2925265200707330
0.1713938528126548 0.0668064938596940 0.1776560499995604
0.4654916310550906 0.0589632147735240 0.1723136599273679
0.0726430854498192 0.1309156597558616 0.0704484165740056
0.3208444314061599 0.1066117080834051 0.0731554132945482
0.3201317613511998 0.2381526510599257 0.1638613933912826
0.0685835820756939 0.2471888982718992 0.1713637071501814
0.4487682962948272 0.3121750321760158 0.0774252494040559
0.1953050363436580 0.3139857728958724 0.0785458186202366
0.0349077499028462 0.9386405013916684 0.0698513498173451
0.2986189924190975 0.3198614643993740 0.2741276943373483
0.9644179414254881 0.6743565017980750 0.0642499245074300
0.6842021192452714 0.6688348922931781 0.0593508448551477
0.8268073378326908 0.6178104389842154 0.1720361352406091
0.5838772936163645 0.6438423144458093 0.1773006201580835
0.5771685315019928 0.5011088980684539 0.0882438612660952
0.8228826971400067 0.4977465834127422 0.0772509896724095
0.6977968719070290 0.4358349778256939 0.1787825743429556
0.9422794474647167 0.4386160452891626 0.1726324561335595
0.8090856531330386 0.8037394922095987 0.0806376321726108
0.8554210450756119 0.8110917842326953 0.1865567407343707
0.8025754982076153 0.9503096290962618 0.1343285697635383
0.6711207636042248 0.8297787352380559 0.1557609505884054
0.7318982275921120 0.0983122620551949 0.2873018675678253
0.9379621504561848 0.0926334989095298 0.2834565506077693
0.5861508854433585 0.0302742914509208 0.3850904577943849
0.8481221174695893 0.0497523237709086 0.3942943937600458
0.8371933354643510 0.9161349691904310 0.2988572115041057
0.5900755807040386 0.9171726706492269 0.2869614140266622
0.9670850951740777 0.8504181016988496 0.3860381373483511
0.7131679668595491 0.8554950734030469 0.3878625194779788
0.5802368645728918 0.2229100541877818 0.2938830982952742
0.4899734919609724 0.2322739390336209 0.3904045706208411
0.6587443545720274 0.3140348724889376 0.3724206013610685
0.4968664255281303 0.3671872559058690 0.3237748403875549
0.9516299042779173 0.4900719691954157 0.4000383079270535
0.7262802056909520 0.4858401285766958 0.4007553095787761
0.8470036461788522 0.5411824166139708 0.2873038673535540
0.6052659608684793 0.5163831399402827 0.2798160906780321
0.5873475153728600 0.6456124103546768 0.3759029273603843
0.8334674595556919 0.6632431901141771 0.3864624003515891
0.7188536332252206 0.7240553592672576 0.2925067989721126
0.9637479660068035 0.7283523697188676 0.2906989241038965
0.6715173441478474 0.0670593767597403 0.1779816773477595
0.9656728015137047 0.0597810635145654 0.1714448977929380
0.5724222576900103 0.1299656463716360 0.0707800224893895
0.8206736061558865 0.1063286342872816 0.0729529016808604
0.8203263787312658 0.2383290282522369 0.1632635408207774
0.5687521275750417 0.2465276365795095 0.1712607116842373
0.9494763654337275 0.3131125891150527 0.0772014279752027
0.6952676273335371 0.3132339279289163 0.0780402080982403
0.5354945510780809 0.9382254023400803 0.0701507592985307
0.7982676445106365 0.3220765568354033 0.2724075771470503
0.00000000E+00 0.00000000E+00 0.00000000E+00
0.00000000E+00 0.00000000E+00 0.00000000E+00
0.00000000E+00 0.00000000E+00 0.00000000E+00
0.00000000E+00 0.00000000E+00 0.00000000E+00
0.00000000E+00 0.00000000E+00 0.00000000E+00
0.00000000E+00 0.00000000E+00 0.00000000E+00
0.00000000E+00 0.00000000E+00 0.00000000E+00
0.00000000E+00 0.00000000E+00 0.00000000E+00
0.00000000E+00 0.00000000E+00 0.00000000E+00
0.00000000E+00 0.00000000E+00 0.00000000E+00
0.00000000E+00 0.00000000E+00 0.00000000E+00
0.00000000E+00 0.00000000E+00 0.00000000E+00
0.00000000E+00 0.00000000E+00 0.00000000E+00
0.00000000E+00 0.00000000E+00 0.00000000E+00
0.00000000E+00 0.00000000E+00 0.00000000E+00
0.00000000E+00 0.00000000E+00 0.00000000E+00
0.00000000E+00 0.00000000E+00 0.00000000E+00
0.00000000E+00 0.00000000E+00 0.00000000E+00
0.00000000E+00 0.00000000E+00 0.00000000E+00
0.00000000E+00 0.00000000E+00 0.00000000E+00
0.00000000E+00 0.00000000E+00 0.00000000E+00
0.00000000E+00 0.00000000E+00 0.00000000E+00
0.00000000E+00 0.00000000E+00 0.00000000E+00
0.00000000E+00 0.00000000E+00 0.00000000E+00
0.00000000E+00 0.00000000E+00 0.00000000E+00
0.00000000E+00 0.00000000E+00 0.00000000E+00
0.00000000E+00 0.00000000E+00 0.00000000E+00
0.00000000E+00 0.00000000E+00 0.00000000E+00
0.00000000E+00 0.00000000E+00 0.00000000E+00
0.00000000E+00 0.00000000E+00 0.00000000E+00
0.00000000E+00 0.00000000E+00 0.00000000E+00
0.00000000E+00 0.00000000E+00 0.00000000E+00
0.00000000E+00 0.00000000E+00 0.00000000E+00
0.00000000E+00 0.00000000E+00 0.00000000E+00
0.00000000E+00 0.00000000E+00 0.00000000E+00
0.00000000E+00 0.00000000E+00 0.00000000E+00
0.00000000E+00 0.00000000E+00 0.00000000E+00
0.00000000E+00 0.00000000E+00 0.00000000E+00
0.00000000E+00 0.00000000E+00 0.00000000E+00
0.00000000E+00 0.00000000E+00 0.00000000E+00
0.00000000E+00 0.00000000E+00 0.00000000E+00
0.00000000E+00 0.00000000E+00 0.00000000E+00
0.00000000E+00 0.00000000E+00 0.00000000E+00
0.00000000E+00 0.00000000E+00 0.00000000E+00
0.00000000E+00 0.00000000E+00 0.00000000E+00
0.00000000E+00 0.00000000E+00 0.00000000E+00
0.00000000E+00 0.00000000E+00 0.00000000E+00
0.00000000E+00 0.00000000E+00 0.00000000E+00
0.00000000E+00 0.00000000E+00 0.00000000E+00
0.00000000E+00 0.00000000E+00 0.00000000E+00
0.00000000E+00 0.00000000E+00 0.00000000E+00
0.00000000E+00 0.00000000E+00 0.00000000E+00
0.00000000E+00 0.00000000E+00 0.00000000E+00
0.00000000E+00 0.00000000E+00 0.00000000E+00
0.00000000E+00 0.00000000E+00 0.00000000E+00
0.00000000E+00 0.00000000E+00 0.00000000E+00
0.00000000E+00 0.00000000E+00 0.00000000E+00
0.00000000E+00 0.00000000E+00 0.00000000E+00
0.00000000E+00 0.00000000E+00 0.00000000E+00
0.00000000E+00 0.00000000E+00 0.00000000E+00
0.00000000E+00 0.00000000E+00 0.00000000E+00
0.00000000E+00 0.00000000E+00 0.00000000E+00
0.00000000E+00 0.00000000E+00 0.00000000E+00
0.00000000E+00 0.00000000E+00 0.00000000E+00
0.00000000E+00 0.00000000E+00 0.00000000E+00
0.00000000E+00 0.00000000E+00 0.00000000E+00
0.00000000E+00 0.00000000E+00 0.00000000E+00
0.00000000E+00 0.00000000E+00 0.00000000E+00
0.00000000E+00 0.00000000E+00 0.00000000E+00
0.00000000E+00 0.00000000E+00 0.00000000E+00
0.00000000E+00 0.00000000E+00 0.00000000E+00
0.00000000E+00 0.00000000E+00 0.00000000E+00
0.00000000E+00 0.00000000E+00 0.00000000E+00
0.00000000E+00 0.00000000E+00 0.00000000E+00
0.00000000E+00 0.00000000E+00 0.00000000E+00
0.00000000E+00 0.00000000E+00 0.00000000E+00
0.00000000E+00 0.00000000E+00 0.00000000E+00
0.00000000E+00 0.00000000E+00 0.00000000E+00
0.00000000E+00 0.00000000E+00 0.00000000E+00
0.00000000E+00 0.00000000E+00 0.00000000E+00
0.00000000E+00 0.00000000E+00 0.00000000E+00
0.00000000E+00 0.00000000E+00 0.00000000E+00
0.00000000E+00 0.00000000E+00 0.00000000E+00
0.00000000E+00 0.00000000E+00 0.00000000E+00
0.00000000E+00 0.00000000E+00 0.00000000E+00
0.00000000E+00 0.00000000E+00 0.00000000E+00
0.00000000E+00 0.00000000E+00 0.00000000E+00
0.00000000E+00 0.00000000E+00 0.00000000E+00
0.00000000E+00 0.00000000E+00 0.00000000E+00
0.00000000E+00 0.00000000E+00 0.00000000E+00
0.00000000E+00 0.00000000E+00 0.00000000E+00
0.00000000E+00 0.00000000E+00 0.00000000E+00
0.00000000E+00 0.00000000E+00 0.00000000E+00
0.00000000E+00 0.00000000E+00 0.00000000E+00
0.00000000E+00 0.00000000E+00 0.00000000E+00
0.00000000E+00 0.00000000E+00 0.00000000E+00
0.00000000E+00 0.00000000E+00 0.00000000E+00
0.00000000E+00 0.00000000E+00 0.00000000E+00
0.00000000E+00 0.00000000E+00 0.00000000E+00
0.00000000E+00 0.00000000E+00 0.00000000E+00
0.00000000E+00 0.00000000E+00 0.00000000E+00
0.00000000E+00 0.00000000E+00 0.00000000E+00
0.00000000E+00 0.00000000E+00 0.00000000E+00
0.00000000E+00 0.00000000E+00 0.00000000E+00
0.00000000E+00 0.00000000E+00 0.00000000E+00
0.00000000E+00 0.00000000E+00 0.00000000E+00
0.00000000E+00 0.00000000E+00 0.00000000E+00
0.00000000E+00 0.00000000E+00 0.00000000E+00
0.00000000E+00 0.00000000E+00 0.00000000E+00
0.00000000E+00 0.00000000E+00 0.00000000E+00
0.00000000E+00 0.00000000E+00 0.00000000E+00
0.00000000E+00 0.00000000E+00 0.00000000E+00
0.00000000E+00 0.00000000E+00 0.00000000E+00
0.00000000E+00 0.00000000E+00 0.00000000E+00
0.00000000E+00 0.00000000E+00 0.00000000E+00
0.00000000E+00 0.00000000E+00 0.00000000E+00
0.00000000E+00 0.00000000E+00 0.00000000E+00
0.00000000E+00 0.00000000E+00 0.00000000E+00
0.00000000E+00 0.00000000E+00 0.00000000E+00
0.00000000E+00 0.00000000E+00 0.00000000E+00
0.00000000E+00 0.00000000E+00 0.00000000E+00
0.00000000E+00 0.00000000E+00 0.00000000E+00
0.00000000E+00 0.00000000E+00 0.00000000E+00
0.00000000E+00 0.00000000E+00 0.00000000E+00
0.00000000E+00 0.00000000E+00 0.00000000E+00
0.00000000E+00 0.00000000E+00 0.00000000E+00
0.00000000E+00 0.00000000E+00 0.00000000E+00
0.00000000E+00 0.00000000E+00 0.00000000E+00
0.00000000E+00 0.00000000E+00 0.00000000E+00
0.00000000E+00 0.00000000E+00 0.00000000E+00
0.00000000E+00 0.00000000E+00 0.00000000E+00
0.00000000E+00 0.00000000E+00 0.00000000E+00
0.00000000E+00 0.00000000E+00 0.00000000E+00
0.00000000E+00 0.00000000E+00 0.00000000E+00
0.00000000E+00 0.00000000E+00 0.00000000E+00
0.00000000E+00 0.00000000E+00 0.00000000E+00
0.00000000E+00 0.00000000E+00 0.00000000E+00
0.00000000E+00 0.00000000E+00 0.00000000E+00
0.00000000E+00 0.00000000E+00 0.00000000E+00
0.00000000E+00 0.00000000E+00 0.00000000E+00
0.00000000E+00 0.00000000E+00 0.00000000E+00
0.00000000E+00 0.00000000E+00 0.00000000E+00
0.00000000E+00 0.00000000E+00 0.00000000E+00
0.00000000E+00 0.00000000E+00 0.00000000E+00
0.00000000E+00 0.00000000E+00 0.00000000E+00
0.00000000E+00 0.00000000E+00 0.00000000E+00
0.00000000E+00 0.00000000E+00 0.00000000E+00
0.00000000E+00 0.00000000E+00 0.00000000E+00
0.00000000E+00 0.00000000E+00 0.00000000E+00
0.00000000E+00 0.00000000E+00 0.00000000E+00
0.00000000E+00 0.00000000E+00 0.00000000E+00
0.00000000E+00 0.00000000E+00 0.00000000E+00
0.00000000E+00 0.00000000E+00 0.00000000E+00
0.00000000E+00 0.00000000E+00 0.00000000E+00
0.00000000E+00 0.00000000E+00 0.00000000E+00
0.00000000E+00 0.00000000E+00 0.00000000E+00
0.00000000E+00 0.00000000E+00 0.00000000E+00
0.00000000E+00 0.00000000E+00 0.00000000E+00
0.00000000E+00 0.00000000E+00 0.00000000E+00
0.00000000E+00 0.00000000E+00 0.00000000E+00
0.00000000E+00 0.00000000E+00 0.00000000E+00
0.00000000E+00 0.00000000E+00 0.00000000E+00
0.00000000E+00 0.00000000E+00 0.00000000E+00
0.00000000E+00 0.00000000E+00 0.00000000E+00
0.00000000E+00 0.00000000E+00 0.00000000E+00
0.00000000E+00 0.00000000E+00 0.00000000E+00
0.00000000E+00 0.00000000E+00 0.00000000E+00
0.00000000E+00 0.00000000E+00 0.00000000E+00
0.00000000E+00 0.00000000E+00 0.00000000E+00
0.00000000E+00 0.00000000E+00 0.00000000E+00
0.00000000E+00 0.00000000E+00 0.00000000E+00
0.00000000E+00 0.00000000E+00 0.00000000E+00
0.00000000E+00 0.00000000E+00 0.00000000E+00
0.00000000E+00 0.00000000E+00 0.00000000E+00
0.00000000E+00 0.00000000E+00 0.00000000E+00
0.00000000E+00 0.00000000E+00 0.00000000E+00
0.00000000E+00 0.00000000E+00 0.00000000E+00
0.00000000E+00 0.00000000E+00 0.00000000E+00
0.00000000E+00 0.00000000E+00 0.00000000E+00
0.00000000E+00 0.00000000E+00 0.00000000E+00
0.00000000E+00 0.00000000E+00 0.00000000E+00
0.00000000E+00 0.00000000E+00 0.00000000E+00
0.00000000E+00 0.00000000E+00 0.00000000E+00
0.00000000E+00 0.00000000E+00 0.00000000E+00
0.00000000E+00 0.00000000E+00 0.00000000E+00
0.00000000E+00 0.00000000E+00 0.00000000E+00
0.00000000E+00 0.00000000E+00 0.00000000E+00
0.00000000E+00 0.00000000E+00 0.00000000E+00
0.00000000E+00 0.00000000E+00 0.00000000E+00
0.00000000E+00 0.00000000E+00 0.00000000E+00
0.00000000E+00 0.00000000E+00 0.00000000E+00
0.00000000E+00 0.00000000E+00 0.00000000E+00
0.00000000E+00 0.00000000E+00 0.00000000E+00
0.00000000E+00 0.00000000E+00 0.00000000E+00
0.00000000E+00 0.00000000E+00 0.00000000E+00
0.00000000E+00 0.00000000E+00 0.00000000E+00
0.00000000E+00 0.00000000E+00 0.00000000E+00
0.00000000E+00 0.00000000E+00 0.00000000E+00
0.00000000E+00 0.00000000E+00 0.00000000E+00
0.00000000E+00 0.00000000E+00 0.00000000E+00
0.00000000E+00 0.00000000E+00 0.00000000E+00
0.00000000E+00 0.00000000E+00 0.00000000E+00
0.00000000E+00 0.00000000E+00 0.00000000E+00
0.00000000E+00 0.00000000E+00 0.00000000E+00
0.00000000E+00 0.00000000E+00 0.00000000E+00
0.00000000E+00 0.00000000E+00 0.00000000E+00
0.00000000E+00 0.00000000E+00 0.00000000E+00
0.00000000E+00 0.00000000E+00 0.00000000E+00
